# Supplementary material for: The evolution of antimicrobial peptides in Chiroptera
Source: Front Immunol. 2023 Sep 26;14:1250229. doi: 10.3389/fimmu.2023.1250229 (PMC10562630; doi:10.3389/fimmu.2023.1250229)
Supplement: Supplementary file 1 [file Table_1.xlsx]

## Sheet: Tables Captions
Table S1	Bat genome assemblies used to model the evolution of AMPs. The accesion numbers and authors that generated each assembly are shown. Busco scores of the genome assemblies are noted in the Complete, Fragmented, and Missing columns .
Table S2	Total TE length and TE type per AMP family. TE count contains the cumulative number of TEs per gene and TE types show the non-redudant TE types that each gene harbors. Total gene and TE lengths are measured in nucleotide base pairs.
Table S3	Transcriptome assemblies used for expression analyses. AMP counts correspond to transcripts detected with blast and curated with Geneious.
Table S4	AMP diversity across Chiroptera with species in rows and AMPs counts in each column.
Table S5	Annotated defensins and cathelicidins gene subfamilies. Genomic localization of each gene is shown in the scaffold, start and end columns, along with their orientation. Exon number per gene is also shown and gene length is measured in base pairs.
Table S6	General statistics of OrthoFinder analysis.
Table S7	Orthogroups (OG) and phylogenetic Hierarchical Orthogroups (HOG) inferred by OrthoFinder for the bat and outgroup AMPs.
Table S8	Statistically significant contractions and expansions of some AMP subfamilies estimated by CAFE. Numbers delimited by <> indicate the position of the node in the ultrametric tree.
Table S9	Duplication events inferred by OrthoFinder. Orthogroups (OG) are shown associated with species and gene tree nodes. All support values are shown.

## Sheet: Table S1
Species	Family	Suborder	Accession Number	Repository	Author	Complete	Fragmented	Missing
Anoura caudifer	Phyllostomidae	Yangochiroptera	GCA_004027475.1	NCBI database	Broad Institute	88.4	6.7	4.9
Artibeus jamaicensis	Phyllostomidae	Yangochiroptera	GCA_014825515.1	Genome Warehouse in BIG Data Center	Wang et al. 2020	92	2.5	5.5
Desmodus rotundus	Phyllostomidae	Yangochiroptera	GCA_002940915.2	NCBI database	Zepeda et al. 2018	92.7	4	3.3
Eptesicus fuscus	Vespertilionidae	Yangochiroptera	GCF_000308155.1	NCBI database	Broad Institute	92.2	4.8	3
Macroglossus sobrinus	Pteropodidae	Yinpterochiroptera	GCA_004027375.1	NCBI database	Broad Institute	92.8	4.5	2.7
Miniopterus natalensis	Miniopteridae	Yangochiroptera	GCA_001595765.1	NCBI database	Eckalbar et al. 2016	95.9	2	2.1
Miniopterus schreibersii	Miniopteridae	Yangochiroptera	GCA_004026525.1	NCBI database	Broad Institute	85.5	10.9	3.6
Molossus molossus	Molossidae	Yangochiroptera	GCA_014108415.1	NCBI database	Jebb et al. 2020	92.9	3.2	3.9
Myotis brandtii	Vespertilionidae	Yangochiroptera	GCA_000412655.1	NCBI database	Seim et al. 2013	90.9	5.4	3.7
Myotis davidii	Vespertilionidae	Yangochiroptera	GCF_000327345.1	NCBI database	Zhang et al. 2013	89.7	6.6	3.7
Myotis lucifugus	Vespertilionidae	Yangochiroptera	GCA_000147115.1	NCBI database	Broad Institute	89.8	5.7	4.5
Myotis myotis	Vespertilionidae	Yangochiroptera	GCA_014108235.1	NCBI database	Jebb et al. 2020	94.8	2.5	2.7
Phyllostomus discolor	Phyllostomidae	Yangochiroptera	GCA_004126475.3	NCBI database	Jebb et al. 2020	94.9	1.8	3.3
Pteropus alecto	Pteropodidae	Yinpterochiroptera	GCA_000325575.1	NCBI database	Broad Institute	96.1	1.9	2
Pteropus vampyrus	Pteropodidae	Yinpterochiroptera	GCA_000151845.2	NCBI database	Broad Institute	91.9	5.1	3
Rhinolophus ferrumequinum	Rhinolophidae	Yinpterochiroptera	GCA_004115265.3	NCBI database	Jebb et al. 2020	95.4	2.4	2.2
Rhinolophus sinicus	Rhinolophidae	Yinpterochiroptera	GCA_001888835.1	NCBI database	Dong et al. 2017	93.1	2.3	4.6
Rousettus aegyptiacus	Pteropodidae	Yinpterochiroptera	GCA_014176215.1	NCBI database	Jebb et al. 2020	95.8	1.9	2.2
Sturnira hondurensis	Phyllostomidae	Yangochiroptera	GCF_014824575.3	Genome Warehouse in BIG Data Center	Wang et al. 2020	91.6	2.1	6.3
Tonatia saurophila	Phyllostomidae	Yangochiroptera	GCA_004024845.1	NCBI database	Broad Institute	83.6	11.2	5.2

## Sheet: Table S2
Species	AMP subfamily	Exons	Gene length	Total TE length	TE count	TE type
Anoura caudifer	DEFB124	2	975	326	2	SINE, LINE
Anoura caudifer	DEFB103A	2	1154	239	1	LINE
Anoura caudifer	DEFB116	2	3417	678	4	LINE, SINE, Unknown
Anoura caudifer	DEFA5	3	6032	1555	3	LINE
Artibeus jamaicensis	DEFB124	2	972	349	2	LINE, SINE
Artibeus jamaicensis	DEFB103A	2	1138	260	1	LINE
Artibeus jamaicensis	DEFB128	2	1650	137	1	SINE
Artibeus jamaicensis	CTHL1	4	2060	712	5	LINE, SINE, DNA
Artibeus jamaicensis	DEFB116	2	4271	586	5	SINE, LTR, Unknown, LINE
Desmodus rotundus	DEFB136	2	681	83	1	LTR
Desmodus rotundus	DEFB25	2	1005	430	4	LINE
Desmodus rotundus	CTHL	3	1080	90	1	LINE
Desmodus rotundus	DEFB103A	2	1116	252	1	LINE
Desmodus rotundus	DEFB119	2	1407	91	1	LINE
Desmodus rotundus	DEFB128	2	1724	131	1	SINE
Desmodus rotundus	DEFB127	2	1882	134	1	SINE
Desmodus rotundus	DEFB33	2	1957	1118	5	DNA, LINE, SINE
Desmodus rotundus	CTHL	4	1990	62	1	LINE
Desmodus rotundus	DEFB116	2	4332	800	5	SINE, LINE, Unknown
Desmodus rotundus	DEFB118	3	5628	2802	8	LINE, DNA
Eptesicus fuscus	DEFB103A	2	1090	217	1	LINE
Eptesicus fuscus	DEFB121	2	1524	50	1	DNA
Eptesicus fuscus	CTHL	2	1589	414	1	SINE
Eptesicus fuscus	DEFB128	2	1722	134	1	SINE
Eptesicus fuscus	DEFB33	2	1753	487	4	DNA, SINE, RC
Eptesicus fuscus	DEFB115	2	1801	57	1	LINE
Eptesicus fuscus	DEFB132	2	1817	741	3	LINE, SINE
Eptesicus fuscus	DEFB6	2	2025	1203	5	LINE, SINE, DNA, Unknown
Eptesicus fuscus	DEFB30	2	2056	234	2	Unknown, LINE
Eptesicus fuscus	DEFB116	2	4476	463	4	LINE, LTR, SINE
Macroglossus sobrinus	DEFB33	2	981	261	1	DNA
Macroglossus sobrinus	DEFA7	2	1246	305	2	LTR, SINE
Macroglossus sobrinus	DEFB128	2	1747	206	2	SINE, LINE
Macroglossus sobrinus	CTHL	4	1869	253	2	DNA, SINE
Macroglossus sobrinus	DEFB116	2	7517	3294	5	SINE, LINE, LTR
Miniopterus natalensis	DEFB127	1	278	635	3	LINE, SINE, Unknown
Miniopterus natalensis	DEFB113	2	955	52	1	DNA
Miniopterus natalensis	DEFB103A	2	1341	248	1	LINE
Miniopterus natalensis	DEFB128	2	1697	132	1	SINE
Miniopterus natalensis	DEFB132	2	1760	509	2	LINE, SINE
Miniopterus natalensis	DEFB115	2	1907	53	1	LINE
Miniopterus natalensis	CTHL	4	2903	1670	7	Unknown, SINE, LINE, RC
Miniopterus natalensis	DEFB118	2	6144	1480	10	LINE, SINE, DNA
Miniopterus natalensis	DEFB124	2	6486	1511	10	SINE, DNA, LINE
Miniopterus schreibersii	DEFB127	1	278	448	2	LINE, SINE
Miniopterus schreibersii	DEFB113	2	957	52	1	DNA
Miniopterus schreibersii	DEFB103A	2	1110	227	1	LINE
Miniopterus schreibersii	DEFB128	2	1699	201	2	SINE
Miniopterus schreibersii	DEFB132	2	1764	441	2	SINE, LINE
Miniopterus schreibersii	DEFB115	2	1907	53	1	LINE
Miniopterus schreibersii	CTHL	4	2943	1572	6	Unknown, LINE, DIRS
Miniopterus schreibersii	DEFB118	2	5777	2284	13	DNA, LINE, SINE, LTR
Miniopterus schreibersii	DEFB123	2	7400	2188	9	LINE, LTR
Molossus molossus	DEFB128	2	1643	165	1	LINE
Molossus molossus	DEFB103A	2	1698	894	3	LINE, Retroposon
Molossus molossus	CTHL	4	1747	247	2	DNA, SINE
Molossus molossus	DEFB132	2	1792	447	2	LINE
Molossus molossus	CTHL	4	2244	148	1	LINE
Molossus molossus	DEFB116	2	4324	581	4	SINE, LINE
Molossus molossus	DEFB118	2	8124	3680	14	LINE, DNA, SINE
Myotis brandtii	DEFB103A	2	1074	226	1	LINE
Myotis brandtii	DEFB119	2	1514	50	1	DNA
Myotis brandtii	DEFB115	2	1818	57	1	LINE
Myotis brandtii	DEFB33	2	2075	772	5	DNA, SINE, LTR, RC
Myotis brandtii	DEFB30	2	2123	162	2	SINE, Unknown
Myotis brandtii	CTHL7	4	2126	88	1	SINE
Myotis brandtii	DEFB12	3	5346	900	5	LINE, SINE, DNA
Myotis brandtii	DEFB116	2	5464	1397	8	LINE, RC, SINE
Myotis davidii	DEFB103A	2	1069	225	1	LINE
Myotis davidii	DEFB119	2	1504	91	2	DNA
Myotis davidii	CTHL	3	1509	556	2	RC, SINE
Myotis davidii	DEFB20	2	1646	186	2	SINE, LTR
Myotis davidii	DEFB115	2	1807	104	2	LINE, LTR
Myotis davidii	DEFB33	2	1858	528	4	DNA, LINE, SINE
Myotis davidii	DEFB122	2	2137	170	1	SINE
Myotis davidii	DEFB116	2	5026	1271	6	LINE, SINE, RC
Myotis davidii	DEFA7	2	6552	1284	7	LTR, LINE, Retroposon, SINE
Myotis lucifugus	DEFB103A	2	1080	229	1	LINE
Myotis lucifugus	DEFB128	2	1673	132	1	SINE
Myotis lucifugus	DEFB33	2	1835	422	3	DNA, LTR
Myotis lucifugus	DEFB115	2	2050	191	3	SINE, LTR, LINE
Myotis lucifugus	CTHL	4	2181	135	2	SINE, LTR
Myotis lucifugus	CTHL	3	2185	196	2	SINE, LINE
Myotis lucifugus	DEFB12	3	3205	916	4	RC, SINE
Myotis lucifugus	DEFB116	2	5023	435	3	SINE, LINE
Myotis lucifugus	CTHL	4	11306	2682	8	LTR, LINE, RC, SINE
Myotis myotis	DEFB103A	2	1073	226	1	LINE
Myotis myotis	DEFB119	2	1510	90	2	DNA
Myotis myotis	DEFB20	2	1688	134	1	SINE
Myotis myotis	DEFB115	2	1821	62	1	LINE
Myotis myotis	DEFB33	2	1846	577	4	DNA, LINE, SINE
Myotis myotis	CTHL	4	2044	365	3	SINE, RC
Myotis myotis	DEFB122	2	2145	213	2	DNA, SINE
Myotis myotis	DEFB116	2	5027	1257	8	RC, LINE, SINE, LTR
Myotis myotis	DEFB123	2	7353	1751	10	LINE, RC, DNA, LTR
Phyllostomus discolor	DEFB124	2	969	203	1	LINE
Phyllostomus discolor	DEFB103A	2	1155	236	1	LINE
Phyllostomus discolor	CTHL	4	1568	297	2	LINE, SINE
Phyllostomus discolor	CTHL	4	1570	188	1	SINE
Phyllostomus discolor	DEFB128	2	1715	226	2	LINE, SINE
Phyllostomus discolor	DEFB115	2	1849	58	1	LINE
Phyllostomus discolor	DEFB116	2	4358	695	4	LINE, SINE
Phyllostomus discolor	DEFB118	2	5647	1512	7	LINE, DNA, LTR
Phyllostomus discolor	DEFB130	3	7949	1675	5	LINE, SINE
Pteropus alecto	DEFB128	2	1734	199	1	SINE
Pteropus alecto	DEFB116	2	7425	759	4	SINE, LINE
Pteropus vampyrus	DEFB128	2	1742	199	1	SINE
Pteropus vampyrus	DEFB35	3	4237	201	1	SINE
Pteropus vampyrus	DEFB116	2	9265	4054	6	SINE, LINE
Rhinolophus ferrumequinum	DEFB103A	2	1245	478	2	SINE, LINE
Rhinolophus ferrumequinum	DEFB128	2	1795	197	1	SINE
Rhinolophus ferrumequinum	CTHL	4	1872	344	3	SINE, DNA, LINE
Rhinolophus ferrumequinum	DEFB108	2	4945	541	2	LINE, DNA
Rhinolophus ferrumequinum	DEFA5	2	6518	801	3	LTR, DNA, LINE
Rhinolophus sinicus	DEFB103A	2	1243	356	1	SINE
Rhinolophus sinicus	DEFB128	2	1798	197	1	SINE
Rhinolophus sinicus	CTHL	4	1886	290	3	SINE, DNA, LINE
Rhinolophus sinicus	DEFB108	2	5005	293	3	DNA, LINE
Rhinolophus sinicus	DEFB123	2	9702	4740	19	LINE, SINE, DNA, LTR, Unknown
Rousettus aegyptiacus	DEFB128	2	1727	102	1	SINE
Rousettus aegyptiacus	CTHL	4	1819	246	2	DNA, SINE
Rousettus aegyptiacus	DEFB116	2	7479	3383	5	SINE, LINE
Sturnira hondurensis	DEFB103A	2	1144	294	1	LINE
Sturnira hondurensis	DEFB124	2	1360	195	1	LINE
Sturnira hondurensis	DEFB128	2	1720	124	1	SINE
Sturnira hondurensis	DEFB127	2	1895	225	1	SINE
Sturnira hondurensis	CTHL1	4	2053	739	5	SINE, LINE
Sturnira hondurensis	DEFB118	2	6044	3158	10	LINE, Unknown, DNA
Tonatia saurophila	DEFA2	2	752	198	1	DNA
Tonatia saurophila	DEFB124	2	975	354	2	SINE, LINE
Tonatia saurophila	DEFB103A	2	1164	295	1	LINE
Tonatia saurophila	CTHL	4	1544	356	2	LINE, SINE
Tonatia saurophila	DEFB128	2	1685	130	1	SINE
Tonatia saurophila	DEFB116	2	4299	1052	6	LINE, SINE, Unknown

## Sheet: Table S3
Species	Diet	Tissue	Accession Number	cathelicidin	alpha-defensin	beta-defensin
Anoura geffroyi	Insectivore	Intestine	PRJNA683917	0	0	0
Anoura geffroyi	Insectivore	Kidney	PRJNA683917	4	7	2
Anoura geffroyi	Insectivore	Lung	Unpublished	8	0	1
Artibeus bogotensis	Frugivore	Intestine	PRJNA683917	1	7	3
Artibeus bogotensis	Frugivore	Kidney	PRJNA683917	0	0	0
Artibeus bogotensis	Frugivore	Liver	PRJNA683917	3	0	0
Artibeus bogotensis	Frugivore	Lung	PRJNA683917	0	0	0
Carollia perspecillata	Frugivore	Intestine	PRJNA683917	20	0	0
Carollia perspecillata	Frugivore	Kidney	PRJNA683917	2	0	0
Carollia perspecillata	Frugivore	Liver	PRJNA683917	2	0	0
Carollia perspecillata	Frugivore	Lung	Unpublished	8	0	0
Desmodus rotundus	Sanguivore	Intestine	PRJNA683917	5	5	1
Desmodus rotundus	Sanguivore	Kidney	PRJNA683917	6	2	0
Desmodus rotundus	Sanguivore	Liver	PRJNA683917	4	0	0
Desmodus rotundus	Sanguivore	Lung	Unpublished	6	0	0
Gardenycteris crenulatum	Insectivore	Intestine	PRJNA683917	3	1	1
Gardenycteris crenulatum	Insectivore	Kidney	PRJNA683917	0	1	4
Gardenycteris crenulatum	Insectivore	Lung	Unpublished	5	0	0
Glossophaga soricina	Nectarivore	Intestine	PRJNA683917	1	5	3
Glossophaga soricina	Nectarivore	Kidney	PRJNA683917	0	0	0
Glossophaga soricina	Nectarivore	Lung	Unpublished	3	0	0
Lonchophylla thomasi	Nectarivore	Intestine	PRJNA683917	2	3	1
Lonchophylla thomasi	Nectarivore	Kidney	PRJNA683917	2	1	0
Lonchophylla thomasi	Nectarivore	Lung	Unpublished	3	0	0
Mesophylla macconnelli	Frugivore	Intestine	PRJNA683917	0	0	0
Mesophylla macconnelli	Frugivore	Kidney	PRJNA683917	3	0	1
Mesophylla macconnelli	Frugivore	Lung	Unpublished	0	0	0
Molossus molossus	Insectivore	Intestine	PRJNA683917	2	8	1
Molossus molossus	Insectivore	Kidney	PRJNA683917	1	1	2
Molossus molossus	Insectivore	Lung	Unpublished	1	0	0
Myotis nigricans	Insectivore	Intestine	PRJNA683917	2	5	1
Myotis nigricans	Insectivore	Kidney	PRJNA683917	1	1	1
Myotis nigricans	Insectivore	Liver	PRJNA683917	4	3	1
Myotis nigricans	Insectivore	Lung	Unpublished	6	0	2
Phyllostomus hastatus	Carnivore	Intestine	PRJNA683917	4	3	0
Phyllostomus hastatus	Carnivore	Kidney	PRJNA683917	1	0	1
Phyllostomus hastatus	Carnivore	Lung	Unpublished	1	0	1
Rhinophylla fischerae	Frugivore	Intestine	PRJNA683917	3	5	2
Rhinophylla fischerae	Frugivore	Kidney	PRJNA683917	2	2	0
Rhinophylla fischerae	Frugivore	Liver	PRJNA683917	0	5	0
Rhinophylla fischerae	Frugivore	Lung	Unpublished	5	0	0
Saccopteryx bilineata	Insectivore	Intestine	PRJNA683917	0	0	0
Saccopteryx bilineata	Insectivore	Kidney	PRJNA683917	1	0	1
Saccopteryx bilineata	Insectivore	Liver	PRJNA683917	1	3	0
Sturnira ludovici	Frugivore	Intestine	PRJNA683917	0	6	1
Sturnira ludovici	Frugivore	Kidney	PRJNA683917	0	1	3
Sturnira ludovici	Frugivore	Liver	PRJNA683917	1	0	1
Sturnira ludovici	Frugivore	Lung	Unpublished	3	0	0
Tonatia saurophila	Insectivore	Intestine	PRJNA683917	0	16	0
Tonatia saurophila	Insectivore	Kidney	PRJNA683917	1	1	1
Tonatia saurophila	Insectivore	Lung	Unpublished	2	0	0

## Sheet: Table S4
	adrenomedullin	alpha-defensin	amyloid	angiogenin	beta-defensin	calcitonin	cathelicidin	chemokine	chromogranin	cytokine	elafin	eotaxin	glyceraldehyde	hepcidin	histone	interleukin	kinase	kunitz-bpti	lysozyme	nonhistone	resistin	ribonuclease	rnase	saposin	serine	thymosin	trypsin	ubiquitin	wap
Anoura caudifer	6	2	1	0	15	1	0	12	4	15	0	1	3	0	41	8	15	8	2	0	0	0	0	0	8	0	16	76	7
Artibeus jamaicensis	0	1	2	0	14	0	1	24	4	21	0	1	0	0	33	14	10	16	0	1	0	0	0	0	15	10	18	61	5
Desmodus rotundus	0	1	1	0	14	0	1	20	0	20	0	1	6	0	41	12	11	8	7	0	0	0	0	0	12	5	14	40	5
Eptesicus fuscus	0	2	1	0	14	0	1	6	7	7	0	1	4	0	32	2	11	17	0	0	0	2	1	0	15	10	16	79	4
Macroglossus sobrinus	0	1	1	0	13	0	1	5	4	5	0	1	0	0	20	4	10	18	0	0	0	0	0	3	10	7	12	16	2
Miniopterus natalensis	0	2	0	0	15	0	1	25	4	24	0	0	6	0	32	14	5	17	0	0	4	0	0	2	15	5	16	69	3
Miniopterus schreibersii	0	1	0	0	14	0	1	17	4	14	0	0	3	0	19	5	10	17	5	0	4	0	0	0	15	5	16	61	1
Molossus molossus	0	0	0	0	12	0	1	24	0	22	0	1	3	0	32	12	11	6	0	0	0	0	0	0	8	23	12	55	3
Myotis brandtii	5	0	1	0	15	1	1	18	0	18	0	0	0	2	15	12	6	32	3	0	0	0	0	0	12	12	16	69	3
Myotis davidii	0	1	1	0	14	0	1	17	0	17	0	1	3	2	19	10	5	24	3	2	0	0	0	0	18	0	18	86	2
Myotis lucifugus	0	1	1	0	15	0	1	29	0	26	0	0	0	2	25	19	5	73	3	4	0	2	2	0	9	9	14	84	4
Myotis myotis	0	1	1	1	17	0	1	15	0	15	1	0	3	0	24	9	15	18	3	1	0	1	1	0	12	5	12	84	5
Phyllostomus discolor	0	0	1	0	16	0	1	20	1	18	0	0	0	0	10	15	15	16	0	0	0	0	0	0	10	14	12	81	2
Pteropus alecto	0	1	1	0	14	0	0	21	5	15	0	0	6	0	39	12	10	22	0	0	4	0	0	4	12	23	14	33	4
Pteropus vampyrus	0	0	1	0	15	0	0	15	5	11	0	0	9	0	51	10	5	22	0	0	4	0	0	4	9	22	12	33	4
Rhinolophus ferrumequinum	0	1	1	0	12	0	1	5	8	9	0	0	3	0	19	6	15	40	0	0	0	0	0	0	14	10	16	36	4
Rhinolophus sinicus	0	0	1	0	13	0	1	14	6	18	0	0	0	0	22	7	15	32	0	2	0	0	0	0	12	4	14	53	4
Rousettus aegyptiacus	0	1	1	0	12	0	1	14	5	16	0	0	0	0	28	9	10	33	0	1	0	0	0	3	13	21	16	16	2
Sturnira hondurensis	0	2	1	0	10	0	1	13	5	16	0	1	0	0	12	12	15	8	0	1	0	0	0	1	13	3	16	35	2
Tonatia saurophila	0	2	1	0	12	0	1	16	0	15	0	0	0	0	28	12	11	8	0	0	4	0	0	0	8	5	12	85	3

## Sheet: Table S5
Species	scaffold	start	end	orientation	AMP	AMP_ID	exons	gene length
Anoura caudifer	AnoCau_scaffold_10715	118808	120639	forward	DEFB	DEFB30	2	1831
Anoura caudifer	AnoCau_scaffold_10715	107173	107879	reverse	DEFB	DEFB136	2	706
Anoura caudifer	AnoCau_scaffold_16142	3151	4665	reverse	DEFB	DEFB132	2	1514
Anoura caudifer	AnoCau_scaffold_16142	42286	43908	forward	DEFB	DEFB128	2	1622
Anoura caudifer	AnoCau_scaffold_16142	56365	56751	reverse	DEFB	DEFB127	1	386
Anoura caudifer	AnoCau_scaffold_8269	128083	129058	forward	DEFB	DEFB124	2	975
Anoura caudifer	AnoCau_scaffold_17899	42931	44123	reverse	DEFB	DEFB121	2	1192
Anoura caudifer	AnoCau_scaffold_17899	25745	27178	reverse	DEFB	DEFB119	2	1433
Anoura caudifer	AnoCau_scaffold_18550	9037	12454	forward	DEFB	DEFB116	2	3417
Anoura caudifer	AnoCau_scaffold_1664	323290	324504	forward	DEFB	DEFB113	2	1214
Anoura caudifer	AnoCau_scaffold_26335	4464	5618	reverse	DEFB	DEFB103A	2	1154
Anoura caudifer	AnoCau_scaffold_33222	1208	7240	reverse	DEFA	DEFA5	3	6032
Anoura caudifer	AnoCau_scaffold_25774	27256	27955	forward	DEFA	DEFA1	2	699
Artibeus jamaicensis	fragScaff_scaffold_195	2719478	2719684	reverse	DEFB	DEFB1	1	206
Artibeus jamaicensis	fragScaff_scaffold_280	302307	303663	reverse	DEFB	DEFB114	2	1356
Artibeus jamaicensis	fragScaff_scaffold_280	322860	324085	reverse	DEFB	DEFB113	2	1225
Artibeus jamaicensis	fragScaff_scaffold_364	1122428	1124291	reverse	DEFB	DEFB30	2	1863
Artibeus jamaicensis	fragScaff_scaffold_364	1137059	1137736	forward	DEFB	DEFB136	2	677
Artibeus jamaicensis	fragScaff_scaffold_437	5279	7339	forward	CTHL	CTHL1	4	2060
Artibeus jamaicensis	original_scaffold_29142	1342071	1343721	forward	DEFB	DEFB128	2	1650
Artibeus jamaicensis	original_scaffold_29142	1356645	1357088	reverse	DEFB	DEFB127	1	443
Artibeus jamaicensis	original_scaffold_29142	1565337	1566309	reverse	DEFB	DEFB124	2	972
Artibeus jamaicensis	original_scaffold_29142	1499571	1501004	reverse	DEFB	DEFB119	2	1433
Artibeus jamaicensis	original_scaffold_29142	1453019	1457290	reverse	DEFB	DEFB116	2	4271
Artibeus jamaicensis	original_scaffold_29142	1432326	1434241	forward	DEFB	DEFB115	2	1915
Artibeus jamaicensis	original_scaffold_41796	44861	45999	reverse	DEFB	DEFB103A	2	1138
Artibeus jamaicensis	original_scaffold_41796	4039	4752	reverse	DEFA	DEFA1	2	713
Desmodus rotundus	KZ672182.1	5411170	5412413	forward	DEFB	DEFB113	2	1243
Desmodus rotundus	KZ672222.1	21320081	21321086	reverse	DEFB	DEFB25	2	1005
Desmodus rotundus	KZ672222.1	21091103	21092827	forward	DEFB	DEFB128	2	1724
Desmodus rotundus	KZ672222.1	21104867	21106749	reverse	DEFB	DEFB127	2	1882
Desmodus rotundus	KZ672222.1	21273504	21274689	reverse	DEFB	DEFB121	2	1185
Desmodus rotundus	KZ672222.1	21259026	21260433	reverse	DEFB	DEFB119	2	1407
Desmodus rotundus	KZ672222.1	21242503	21248131	forward	DEFB	DEFB118	3	5628
Desmodus rotundus	KZ672222.1	21210595	21214927	reverse	DEFB	DEFB116	2	4332
Desmodus rotundus	KZ672222.1	21192149	21194056	forward	DEFB	DEFB115	2	1907
Desmodus rotundus	KZ672422.1	30307794	30309784	reverse	CTHL	CTHL	4	1990
Desmodus rotundus	KZ672422.1	30813094	30814174	forward	CTHL	CTHL	3	1080
Desmodus rotundus	KZ672452.1	8164671	8166556	forward	DEFB	DEFB30	2	1885
Desmodus rotundus	KZ672452.1	8152382	8153063	reverse	DEFB	DEFB136	2	681
Desmodus rotundus	KZ672545.1	2759984	2761941	reverse	DEFB	DEFB33	2	1957
Desmodus rotundus	KZ672545.1	2776437	2777553	reverse	DEFB	DEFB103A	2	1116
Desmodus rotundus	KZ672545.1	2736981	2737689	reverse	DEFA	DEFA5	2	708
Eptesicus fuscus	JH977989.1	176089	178114	reverse	DEFB	DEFB6	2	2025
Eptesicus fuscus	JH977989.1	161774	163527	reverse	DEFB	DEFB33	2	1753
Eptesicus fuscus	JH977989.1	187462	188552	reverse	DEFB	DEFB103A	2	1090
Eptesicus fuscus	JH977989.1	142363	143068	reverse	DEFA	DEFA5	2	705
Eptesicus fuscus	JH977778.1	25254	26263	reverse	DEFB	DEFB113	2	1009
Eptesicus fuscus	JH977744.1	2347205	2347933	forward	DEFA	DEFA1	2	728
Eptesicus fuscus	JH977673.1	8711717	8713773	forward	DEFB	DEFB30	2	2056
Eptesicus fuscus	JH977673.1	8693051	8693756	reverse	DEFB	DEFB136	2	705
Eptesicus fuscus	JH977624.1	1711156	1712973	forward	DEFB	DEFB132	2	1817
Eptesicus fuscus	JH977624.1	1656602	1658324	reverse	DEFB	DEFB128	2	1722
Eptesicus fuscus	JH977624.1	1645165	1645608	forward	DEFB	DEFB127	1	443
Eptesicus fuscus	JH977624.1	1434037	1435561	forward	DEFB	DEFB121	2	1524
Eptesicus fuscus	JH977624.1	1423734	1424893	forward	DEFB	DEFB121	2	1159
Eptesicus fuscus	JH977624.1	1488228	1492704	forward	DEFB	DEFB116	2	4476
Eptesicus fuscus	JH977624.1	1509317	1511118	reverse	DEFB	DEFB115	2	1801
Eptesicus fuscus	JH977614.1	40007411	40009000	reverse	CTHL	CTHL	2	1589
Macroglossus sobrinus	MacSob_scaffold_10204	43722	45591	forward	CTHL	CTHL	4	1869
Macroglossus sobrinus	MacSob_scaffold_13249	25454	26435	reverse	DEFB	DEFB33	2	981
Macroglossus sobrinus	MacSob_scaffold_13249	11270	12516	reverse	DEFA	DEFA7	2	1246
Macroglossus sobrinus	MacSob_scaffold_1565	126176	127179	forward	DEFB	DEFB113	2	1003
Macroglossus sobrinus	MacSob_scaffold_2400	41991	43863	reverse	DEFB	DEFB30	2	1872
Macroglossus sobrinus	MacSob_scaffold_2400	52982	53638	forward	DEFB	DEFB136	2	656
Macroglossus sobrinus	MacSob_scaffold_2434	334965	337242	forward	CTHL	CTHL	4	2277
Macroglossus sobrinus	MacSob_scaffold_3098	78519	78818	reverse	DEFB	DEFB121	1	299
Macroglossus sobrinus	MacSob_scaffold_3098	67766	69175	reverse	DEFB	DEFB119	2	1409
Macroglossus sobrinus	MacSob_scaffold_3098	1287	8804	reverse	DEFB	DEFB116	2	7517
Macroglossus sobrinus	MacSob_scaffold_3252	130017	131523	forward	DEFB	DEFB132	2	1506
Macroglossus sobrinus	MacSob_scaffold_3252	92913	94660	reverse	DEFB	DEFB128	2	1747
Macroglossus sobrinus	MacSob_scaffold_3252	83692	84072	forward	DEFB	DEFB127	1	380
Miniopterus natalensis	LDJU01000232.1	794963	797866	reverse	CTHL	CTHL	4	2903
Miniopterus natalensis	LDJU01000202.1	592313	594073	reverse	DEFB	DEFB132	2	1760
Miniopterus natalensis	LDJU01000202.1	634059	635756	forward	DEFB	DEFB128	2	1697
Miniopterus natalensis	LDJU01000202.1	645159	645437	reverse	DEFB	DEFB127	1	278
Miniopterus natalensis	LDJU01000202.1	700001	700474	forward	DEFB	DEFB125	1	473
Miniopterus natalensis	LDJU01000202.1	836667	843153	reverse	DEFB	DEFB124	2	6486
Miniopterus natalensis	LDJU01000202.1	800579	801710	reverse	DEFB	DEFB121	2	1131
Miniopterus natalensis	LDJU01000202.1	788567	789989	reverse	DEFB	DEFB119	2	1422
Miniopterus natalensis	LDJU01000202.1	771364	777508	forward	DEFB	DEFB118	2	6144
Miniopterus natalensis	LDJU01000202.1	705014	706921	forward	DEFB	DEFB115	2	1907
Miniopterus natalensis	LDJU01000061.1	3577449	3578790	forward	DEFB	DEFB103A	2	1341
Miniopterus natalensis	LDJU01000061.1	3618020	3618749	forward	DEFA	DEFA7	2	729
Miniopterus natalensis	LDJU01000061.1	3628626	3629348	forward	DEFA	DEFA7	2	722
Miniopterus natalensis	LDJU01000061.1	3613919	3614647	forward	DEFA	DEF6	3	728
Miniopterus natalensis	LDJU01000041.1	637388	638343	forward	DEFB	DEFB113	2	955
Miniopterus natalensis	LDJU01000020.1	277704	279607	forward	DEFB	DEFB30	2	1903
Miniopterus natalensis	LDJU01000020.1	265492	266165	reverse	DEFB	DEFB136	2	673
Miniopterus schreibersii	MinSch_scaffold_1110	250944	253887	reverse	CTHL	CTHL	4	2943
Miniopterus schreibersii	MinSch_scaffold_11896	7393	14793	reverse	DEFB	DEFB123	2	7400
Miniopterus schreibersii	MinSch_scaffold_11896	33284	34416	forward	DEFB	DEFB121	2	1132
Miniopterus schreibersii	MinSch_scaffold_11896	44688	46094	forward	DEFB	DEFB119	2	1406
Miniopterus schreibersii	MinSch_scaffold_11896	56721	62498	reverse	DEFB	DEFB118	2	5777
Miniopterus schreibersii	MinSch_scaffold_12672	46697	48608	reverse	DEFB	DEFB30	2	1911
Miniopterus schreibersii	MinSch_scaffold_12672	58589	59262	forward	DEFB	DEFB136	2	673
Miniopterus schreibersii	MinSch_scaffold_16703	52653	54417	reverse	DEFB	DEFB132	2	1764
Miniopterus schreibersii	MinSch_scaffold_31603	7555	8665	forward	DEFB	DEFB103A	2	1110
Miniopterus schreibersii	MinSch_scaffold_32123	12025	13932	reverse	DEFB	DEFB115	2	1907
Miniopterus schreibersii	MinSch_scaffold_32205	20227	21926	reverse	DEFB	DEFB128	2	1699
Miniopterus schreibersii	MinSch_scaffold_32205	10969	11247	forward	DEFB	DEFB127	1	278
Miniopterus schreibersii	MinSch_scaffold_41362	148	876	forward	DEFA	DEFA7	2	728
Miniopterus schreibersii	MinSch_scaffold_41362	10790	11498	forward	DEFA	DEFA7	2	708
Miniopterus schreibersii	MinSch_scaffold_4177	149900	150106	reverse	DEFB	DEFB1	1	206
Miniopterus schreibersii	MinSch_scaffold_8871	109332	110289	forward	DEFB	DEFB113	2	957
Molossus molossus	scaffold_m16_p_18	62549410	62551654	reverse	CTHL	CTHL	4	2244
Molossus molossus	scaffold_m16_p_18	63170642	63172389	forward	CTHL	CTHL	4	1747
Molossus molossus	scaffold_m16_p_4	86331619	86333437	forward	DEFB	DEFB30	2	1818
Molossus molossus	scaffold_m16_p_4	86314720	86315427	reverse	DEFB	DEFB136	2	707
Molossus molossus	scaffold_m16_p_6	23996947	23998739	forward	DEFB	DEFB132	2	1792
Molossus molossus	scaffold_m16_p_6	23941891	23943534	reverse	DEFB	DEFB128	2	1643
Molossus molossus	scaffold_m16_p_6	23635325	23636514	forward	DEFB	DEFB121	2	1189
Molossus molossus	scaffold_m16_p_6	23650712	23652132	forward	DEFB	DEFB119	2	1420
Molossus molossus	scaffold_m16_p_6	23667472	23675596	reverse	DEFB	DEFB118	2	8124
Molossus molossus	scaffold_m16_p_6	23740678	23745002	forward	DEFB	DEFB116	2	4324
Molossus molossus	scaffold_m16_p_6	23787606	23787836	reverse	DEFB	DEFB115	1	230
Molossus molossus	scaffold_m16_p_8	20303431	20304517	reverse	DEFB	DEFB113	2	1086
Molossus molossus	scaffold_m16_p_9	3912188	3913886	reverse	DEFB	DEFB103A	2	1698
Myotis brandtii	KE164298.1	58464	60539	reverse	DEFB	DEFB33	2	2075
Myotis brandtii	KE164298.1	86833	87907	reverse	DEFB	DEFB103A	2	1074
Myotis brandtii	KE164215.1	3870051	3871177	forward	DEFB	DEFB121	2	1126
Myotis brandtii	KE164215.1	3880303	3881817	forward	DEFB	DEFB119	2	1514
Myotis brandtii	KE163659.1	96958	98464	forward	DEFB	DEFB132	2	1506
Myotis brandtii	KE163659.1	42877	44555	reverse	DEFB	DEFB128	2	1678
Myotis brandtii	KE163659.1	33063	33506	forward	DEFB	DEFB127	1	443
Myotis brandtii	KE163082.1	35918	41382	reverse	DEFB	DEFB116	2	5464
Myotis brandtii	KE163082.1	18927	20745	forward	DEFB	DEFB115	2	1818
Myotis brandtii	KE162593.1	5749	6606	forward	DEFB	DEFB1	2	857
Myotis brandtii	KE162470.1	883858	885984	forward	CTHL	CTHL7	4	2126
Myotis brandtii	KE161742.1	1409567	1410526	forward	DEFB	DEFB113	2	959
Myotis brandtii	KE161692.1	28843	34189	reverse	DEFB	DEFB12	3	5346
Myotis brandtii	KE161395.1	1254817	1256940	forward	DEFB	DEFB30	2	2123
Myotis brandtii	KE161395.1	1235566	1236266	reverse	DEFB	DEFB136	2	700
Myotis davidii	KB115814.1	3084794	3085490	reverse	DEFB	DEFB136	2	696
Myotis davidii	KB112367.1	844861	846370	forward	CTHL	CTHL	3	1509
Myotis davidii	KB110504.1	1735695	1737832	reverse	DEFB	DEFB122	2	2137
Myotis davidii	KB110504.1	1724256	1725377	reverse	DEFB	DEFB121	2	1121
Myotis davidii	KB110504.1	1715055	1716559	reverse	DEFB	DEFB119	2	1504
Myotis davidii	KB109880.1	169883	171741	reverse	DEFB	DEFB33	2	1858
Myotis davidii	KB109880.1	186849	187918	reverse	DEFB	DEFB103A	2	1069
Myotis davidii	KB109880.1	134073	140625	reverse	DEFA	DEFA7	2	6552
Myotis davidii	KB109240.1	62576	67602	reverse	DEFB	DEFB116	2	5026
Myotis davidii	KB109240.1	46397	48204	forward	DEFB	DEFB115	2	1807
Myotis davidii	KB108885.1	2333803	2334716	forward	DEFB	DEFB113	2	913
Myotis davidii	KB102336.1	1150544	1152190	forward	DEFB	DEFB20	2	1646
Myotis davidii	KB102336.1	1107206	1108700	reverse	DEFB	DEFB132	2	1494
Myotis davidii	KB102336.1	1162900	1163343	reverse	DEFB	DEFB127	1	443
Myotis lucifugus	AAPE02060880.1	23933	26114	reverse	CTHL	CTHL	4	2181
Myotis lucifugus	AAPE02060880.1	4771	16077	reverse	CTHL	CTHL	4	11306
Myotis lucifugus	AAPE02063613.1	5368	6814	forward	CTHL	CTHL	3	1446
Myotis lucifugus	GL429768.1	35809009	35809717	forward	DEFB	DEFB136	2	708
Myotis lucifugus	GL429827.1	1722601	1724079	reverse	DEFB	DEFB132	2	1478
Myotis lucifugus	GL429827.1	1771739	1773412	forward	DEFB	DEFB128	2	1673
Myotis lucifugus	GL429827.1	1782749	1783192	reverse	DEFB	DEFB127	1	443
Myotis lucifugus	GL429827.1	1975335	1976463	reverse	DEFB	DEFB121	2	1128
Myotis lucifugus	GL429827.1	1899751	1904774	reverse	DEFB	DEFB116	2	5023
Myotis lucifugus	GL429827.1	1882573	1884623	forward	DEFB	DEFB115	2	2050
Myotis lucifugus	GL429878.1	1007025	1008022	reverse	DEFB	DEFB113	2	997
Myotis lucifugus	GL429878.1	1056986	1057213	reverse	DEFB	DEFB112	1	227
Myotis lucifugus	GL430314.1	155246	157431	reverse	CTHL	CTHL	3	2185
Myotis lucifugus	GL430494.1	47380	50585	reverse	DEFB	DEFB12	3	3205
Myotis lucifugus	GL430507.1	265366	267201	reverse	DEFB	DEFB33	2	1835
Myotis lucifugus	GL430507.1	285394	286474	reverse	DEFB	DEFB103A	2	1080
Myotis lucifugus	GL430507.1	183704	184577	reverse	DEFB	DEFB1	2	873
Myotis lucifugus	GL430507.1	233858	234583	reverse	DEFA	DEFA7	2	725
Myotis myotis	scaffold_m19_p_13	57665392	57667436	reverse	CTHL	CTHL	4	2044
Myotis myotis	scaffold_m19_p_39	1991054	1992900	reverse	DEFB	DEFB33	2	1846
Myotis myotis	scaffold_m19_p_39	2019739	2020812	reverse	DEFB	DEFB103A	2	1073
Myotis myotis	scaffold_m19_p_39	1956894	1957622	reverse	DEFA	DEFA7	2	728
Myotis myotis	scaffold_m19_p_6	73594537	73595233	forward	DEFB	DEFB136	2	696
Myotis myotis	scaffold_m19_p_7	80243695	80244692	forward	DEFB	DEFB113	2	997
Myotis myotis	scaffold_m19_p_7	80193671	80193898	forward	DEFB	DEFB112	1	227
Myotis myotis	scaffold_m19_p_9	62058844	62060532	reverse	DEFB	DEFB20	2	1688
Myotis myotis	scaffold_m19_p_9	62121164	62122666	forward	DEFB	DEFB132	2	1502
Myotis myotis	scaffold_m19_p_9	62047945	62048388	forward	DEFB	DEFB127	1	443
Myotis myotis	scaffold_m19_p_9	62009531	62009854	forward	DEFB	DEFB126	1	323
Myotis myotis	scaffold_m19_p_9	61754758	61762111	reverse	DEFB	DEFB123	2	7353
Myotis myotis	scaffold_m19_p_9	61776230	61778375	forward	DEFB	DEFB122	2	2145
Myotis myotis	scaffold_m19_p_9	61788639	61789766	forward	DEFB	DEFB121	2	1127
Myotis myotis	scaffold_m19_p_9	61798730	61800240	forward	DEFB	DEFB119	2	1510
Myotis myotis	scaffold_m19_p_9	61929481	61934508	forward	DEFB	DEFB116	2	5027
Myotis myotis	scaffold_m19_p_9	61949942	61951763	reverse	DEFB	DEFB115	2	1821
Phyllostomus discolor	scaffold_m19_p_10	21708748	21710316	forward	DEFB	DEFB132	2	1568
Phyllostomus discolor	scaffold_m19_p_10	21668584	21670299	reverse	DEFB	DEFB128	2	1715
Phyllostomus discolor	scaffold_m19_p_10	21445915	21446884	forward	DEFB	DEFB124	2	969
Phyllostomus discolor	scaffold_m19_p_10	21495861	21497047	forward	DEFB	DEFB121	2	1186
Phyllostomus discolor	scaffold_m19_p_10	21511929	21513365	forward	DEFB	DEFB119	2	1436
Phyllostomus discolor	scaffold_m19_p_10	21524628	21530275	reverse	DEFB	DEFB118	2	5647
Phyllostomus discolor	scaffold_m19_p_10	21558687	21563045	forward	DEFB	DEFB116	2	4358
Phyllostomus discolor	scaffold_m19_p_10	21579952	21581801	reverse	DEFB	DEFB115	2	1849
Phyllostomus discolor	scaffold_m19_p_12	91618725	91626674	reverse	DEFB	DEFB130	3	7949
Phyllostomus discolor	scaffold_m19_p_12	91852656	91853811	forward	DEFB	DEFB103A	2	1155
Phyllostomus discolor	scaffold_m19_p_4	86671635	86672858	forward	DEFB	DEFB113	2	1223
Phyllostomus discolor	scaffold_m19_p_7	87147356	87148926	forward	CTHL	CTHL	4	1570
Phyllostomus discolor	scaffold_m19_p_7	87159865	87161433	forward	CTHL	CTHL	4	1568
Phyllostomus discolor	scaffold_m19_p_8	81447826	81449699	forward	DEFB	DEFB30	2	1873
Phyllostomus discolor	scaffold_m19_p_8	81435121	81435805	reverse	DEFB	DEFB136	2	684
Pteropus alecto	KB030405.1	13547241	13549261	forward	DEFB	DEFB30	2	2020
Pteropus alecto	KB030405.1	13537814	13538482	reverse	DEFB	DEFB136	2	668
Pteropus alecto	KB030771.1	10731315	10732171	forward	DEFB	DEFB103A	2	856
Pteropus alecto	KB030771.1	10769865	10771064	forward	DEFA	DEFA7	2	1199
Pteropus alecto	KB031072.1	18439058	18440592	reverse	DEFB	DEFB132	2	1534
Pteropus alecto	KB031072.1	18476387	18478121	forward	DEFB	DEFB128	2	1734
Pteropus alecto	KB031072.1	18487083	18487430	reverse	DEFB	DEFB127	1	347
Pteropus alecto	KB031072.1	18696523	18696822	reverse	DEFB	DEFB121	1	299
Pteropus alecto	KB031072.1	18681326	18682753	reverse	DEFB	DEFB119	2	1427
Pteropus alecto	KB031072.1	18615788	18623213	reverse	DEFB	DEFB116	2	7425
Pteropus alecto	KB031158.1	35700497	35701503	forward	DEFB	DEFB113	2	1006
Pteropus vampyrus	KN525735.1	11778294	11779300	reverse	DEFB	DEFB113	2	1006
Pteropus vampyrus	KN526034.1	857121	861358	reverse	DEFB	DEFB35	3	4237
Pteropus vampyrus	KN526034.1	914479	915297	forward	DEFB	DEFB103A	2	818
Pteropus vampyrus	KN526094.1	738280	738591	reverse	DEFB	DEFB1	1	311
Pteropus vampyrus	KN526105.1	538462	539990	reverse	DEFB	DEFB132	2	1528
Pteropus vampyrus	KN526105.1	578025	579767	forward	DEFB	DEFB128	2	1742
Pteropus vampyrus	KN526105.1	588669	589016	reverse	DEFB	DEFB127	1	347
Pteropus vampyrus	KN526105.1	813368	813667	reverse	DEFB	DEFB121	1	299
Pteropus vampyrus	KN526105.1	799326	800753	reverse	DEFB	DEFB119	2	1427
Pteropus vampyrus	KN526105.1	727585	736850	reverse	DEFB	DEFB116	2	9265
Pteropus vampyrus	KN526485.1	63978	64647	reverse	DEFB	DEFB136	2	669
Rhinolophus ferrumequinum	scaffold_m29_p_16	7740586	7742458	reverse	CTHL	CTHL	4	1872
Rhinolophus ferrumequinum	scaffold_m29_p_16	8308203	8310536	forward	CTHL	CTHL	4	2333
Rhinolophus ferrumequinum	scaffold_m29_p_17	30615124	30616998	reverse	DEFB	DEFB30	2	1874
Rhinolophus ferrumequinum	scaffold_m29_p_17	30632314	30632990	forward	DEFB	DEFB136	2	676
Rhinolophus ferrumequinum	scaffold_m29_p_23	22324655	22326450	forward	DEFB	DEFB128	2	1795
Rhinolophus ferrumequinum	scaffold_m29_p_23	22335455	22335826	reverse	DEFB	DEFB127	1	371
Rhinolophus ferrumequinum	scaffold_m29_p_23	22531255	22532523	reverse	DEFB	DEFB121	2	1268
Rhinolophus ferrumequinum	scaffold_m29_p_23	22520023	22521459	reverse	DEFB	DEFB119	2	1436
Rhinolophus ferrumequinum	scaffold_m29_p_3	22087625	22092570	forward	DEFB	DEFB108	2	4945
Rhinolophus ferrumequinum	scaffold_m29_p_3	101679685	101680930	forward	DEFB	DEFB103A	2	1245
Rhinolophus ferrumequinum	scaffold_m29_p_3	101723791	101730309	forward	DEFA	DEFA5	2	6518
Rhinolophus ferrumequinum	scaffold_m29_p_3	101736637	101737368	forward	DEFA	DEFA5	2	731
Rhinolophus ferrumequinum	scaffold_m29_p_3	101743308	101744041	forward	DEFA	DEFA5	2	733
Rhinolophus ferrumequinum	scaffold_m29_p_3	101749110	101749837	forward	DEFA	DEFA5	2	727
Rhinolophus ferrumequinum	scaffold_m29_p_5	86168779	86169849	forward	DEFB	DEFB113	2	1070
Rhinolophus sinicus	LVEH01000035.1	2535429	2537315	reverse	CTHL	CTHL	4	1886
Rhinolophus sinicus	LVEH01000035.1	3084379	3086711	forward	CTHL	CTHL	4	2332
Rhinolophus sinicus	LVEH01000096.1	3472337	3474201	reverse	DEFB	DEFB30	2	1864
Rhinolophus sinicus	LVEH01000096.1	3489570	3490241	forward	DEFB	DEFB136	2	671
Rhinolophus sinicus	LVEH01000106.1	4723623	4724687	reverse	DEFB	DEFB113	2	1064
Rhinolophus sinicus	LVEH01000267.1	1058159	1067861	reverse	DEFB	DEFB123	2	9702
Rhinolophus sinicus	LVEH01000267.1	1092670	1093995	forward	DEFB	DEFB121	2	1325
Rhinolophus sinicus	LVEH01000267.1	1102425	1103863	forward	DEFB	DEFB119	2	1438
Rhinolophus sinicus	LVEH01000267.1	1167223	1167465	forward	DEFB	DEFB116	1	242
Rhinolophus sinicus	LVEH01000290.1	2854517	2859522	reverse	DEFB	DEFB108	2	5005
Rhinolophus sinicus	LVEH01000867.1	39624	41422	reverse	DEFB	DEFB128	2	1798
Rhinolophus sinicus	LVEH01000867.1	28965	29336	forward	DEFB	DEFB127	1	371
Rhinolophus sinicus	LVEH01000867.1	5321	5623	forward	DEFB	DEFB126	1	302
Rhinolophus sinicus	LVEH01001203.1	3813	5056	forward	DEFB	DEFB103A	2	1243
Rousettus aegyptiacus	scaffold_m13_p_1	104954720	104955694	reverse	DEFB	DEFB113	2	974
Rousettus aegyptiacus	scaffold_m13_p_11	95949975	95950844	reverse	DEFB	DEFB103A	2	869
Rousettus aegyptiacus	scaffold_m13_p_11	95921149	95922308	reverse	DEFA	DEFA5	2	1159
Rousettus aegyptiacus	scaffold_m13_p_12	21002542	21004269	reverse	DEFB	DEFB128	2	1727
Rousettus aegyptiacus	scaffold_m13_p_12	20993314	20993661	forward	DEFB	DEFB127	1	347
Rousettus aegyptiacus	scaffold_m13_p_12	20800224	20800523	forward	DEFB	DEFB121	1	299
Rousettus aegyptiacus	scaffold_m13_p_12	20873174	20880653	forward	DEFB	DEFB116	2	7479
Rousettus aegyptiacus	scaffold_m13_p_16	23085637	23087546	forward	DEFB	DEFB30	2	1909
Rousettus aegyptiacus	scaffold_m13_p_16	23075783	23076453	reverse	DEFB	DEFB136	2	670
Rousettus aegyptiacus	scaffold_m13_p_4	154681359	154683178	forward	CTHL	CTHL	4	1819
Sturnira hondurensis	fragScaff_scaffold_2	3258329	3260192	reverse	DEFB	DEFB30	2	1863
Sturnira hondurensis	fragScaff_scaffold_2	3274273	3274953	forward	DEFB	DEFB136	2	680
Sturnira hondurensis	fragScaff_scaffold_3	10046648	10047873	reverse	DEFB	DEFB113	2	1225
Sturnira hondurensis	fragScaff_scaffold_55	83772	84916	forward	DEFB	DEFB103A	2	1144
Sturnira hondurensis	fragScaff_scaffold_55	146529	147229	forward	DEFA	DEFA5	3	700
Sturnira hondurensis	fragScaff_scaffold_55	124522	125224	forward	DEFA	DEFA1	2	702
Sturnira hondurensis	fragScaff_scaffold_68	30049536	30051256	reverse	DEFB	DEFB128	2	1720
Sturnira hondurensis	fragScaff_scaffold_68	30034586	30036481	forward	DEFB	DEFB127	2	1895
Sturnira hondurensis	fragScaff_scaffold_68	17895561	17896921	reverse	DEFB	DEFB124	2	1360
Sturnira hondurensis	fragScaff_scaffold_68	17827390	17828811	reverse	DEFB	DEFB121	2	1421
Sturnira hondurensis	fragScaff_scaffold_68	17846137	17847330	reverse	DEFB	DEFB121	2	1193
Sturnira hondurensis	fragScaff_scaffold_68	17810358	17816402	forward	DEFB	DEFB118	2	6044
Sturnira hondurensis	original_scaffold_4263	20683756	20685809	reverse	CTHL	CTHL1	4	2053
Tonatia saurophila	TonSau_scaffold_12647	86931	88791	forward	DEFB	DEFB30	2	1860
Tonatia saurophila	TonSau_scaffold_12647	75229	75906	reverse	DEFB	DEFB136	2	677
Tonatia saurophila	TonSau_scaffold_14038	6051	6257	forward	DEFB	DEFB1	1	206
Tonatia saurophila	TonSau_scaffold_1636	252262	253237	forward	DEFB	DEFB124	2	975
Tonatia saurophila	TonSau_scaffold_1636	298659	299824	forward	DEFB	DEFB121	2	1165
Tonatia saurophila	TonSau_scaffold_1636	313125	314570	forward	DEFB	DEFB119	2	1445
Tonatia saurophila	TonSau_scaffold_18466	6952	11251	forward	DEFB	DEFB116	2	4299
Tonatia saurophila	TonSau_scaffold_24379	33480	34856	forward	CTHL	CTHL	4	1376
Tonatia saurophila	TonSau_scaffold_28246	20154	21318	reverse	DEFB	DEFB103A	2	1164
Tonatia saurophila	TonSau_scaffold_29745	1015	1767	forward	DEFA	DEFA2	2	752
Tonatia saurophila	TonSau_scaffold_30527	20009	20708	forward	DEFA	DEFA5	2	699
Tonatia saurophila	TonSau_scaffold_370	561088	562317	forward	DEFB	DEFB113	2	1229
Tonatia saurophila	TonSau_scaffold_37565	3680	5224	forward	CTHL	CTHL	4	1544
Tonatia saurophila	TonSau_scaffold_5506	46522	48071	forward	DEFB	DEFB132	2	1549
Tonatia saurophila	TonSau_scaffold_5506	9229	10914	reverse	DEFB	DEFB128	2	1685

## Sheet: Table S6
Number of species	24
Number of genes	469
Number of genes in orthogroups	468
Number of unassigned genes	1
Percentage of genes in orthogroups	99.8
Percentage of unassigned genes	0.2
Number of orthogroups	31
Number of species-specific orthogroups	3
Number of genes in species-specific orthogroups	8
Percentage of genes in species-specific orthogroups	1.7
Mean orthogroup size	15.1
Median orthogroup size	14
G50 (assigned genes)	23
G50 (all genes)	23
O50 (assigned genes)	8
O50 (all genes)	8
Number of orthogroups with all species present	0
Number of single-copy orthogroups	0
Average number of genes per-species in orthogroup	Number of orthogroups	Percentage of orthogroups	Number of genes	Percentage of genes
<1	25	80.6	269	57.5
1	6	19.4	199	42.5
2	0	0	0	0
3	0	0	0	0
4	0	0	0	0
5	0	0	0	0
6	0	0	0	0
7	0	0	0	0
8	0	0	0	0
9	0	0	0	0
10	0	0	0	0
11-15	0	0	0	0
16-20	0	0	0	0
21-50	0	0	0	0
51-100	0	0	0	0
101-150	0	0	0	0
151-200	0	0	0	0
201-500	0	0	0	0
501-1000	0	0	0	0
1001+	0	0	0	0
Number of species in orthogroup	Number of orthogroups
1	3
2	1
3	3
4	3
5	0
6	0
7	2
8	2
9	0
10	0
11	1
12	0
13	0
14	3
15	1
16	1
17	1
18	0
19	2
20	0
21	2
22	1
23	5
24	0

## Sheet: Table S7
HOG	OG	Gene Tree Parent Clade	Anoura caudifer	Artibeus jamaicensis	Bos taurus	Canis lupus familiaris	Desmodus rotundus	Equus caballus	Eptesicus fuscus	Myotis brandtii	Myotis davidii	Myotis lucifugus	Molossus molossus	Myotis myotis	Miniopterus natalensis	Miniopterus schreibersii	Macroglossus sobrinus	Pteropus alecto	Phyllostomus discolor	Pteropus vampyrus	Rousettus aegyptiacus	Rhinolophus ferrumequinum	Rhinolophus sinicus	Sturnira hondurensis	Sus scrofa	Tonatia saurophila
N0.HOG0000000	OG0000000	n0	acaudifer00000239-RA_DEFA5, acaudifer00000220-RA_DEFA1	ajamaicensis00000249-RA_DEFA1			drotundus00000285-RA_DEFA5	ecaballus_DEFA_4, ecaballus_DEFA_3, ecaballus_DEFA1, ecaballus_DEFA1, ecaballus_DEFA_1, ecaballus_DEFA20, ecaballus_DEFA_5L, ecaballus_DEFA_27, ecaballus_DEFA_25, ecaballus_DEFA20, ecaballus_DEFA20, ecaballus_DEFA20, ecaballus_DEFA_21, ecaballus_DEFA_20, ecaballus_DEFA22, ecaballus_DEFA_22, ecaballus_DEFA_24, ecaballus_DEFA20	efuscus00000231-RA_DEFA5, efuscus00000179-RA_DEFA1		mdavidii00000209-RA_DEF7	mlucifugus00000279-RA_DEF7		mmyotis00000317-RA_DEF7	mnatalensis00000055-RA_DEF7, mnatalensis00000054-RA_DEF6, mnatalensis00000056-RA_DEF7	mschreibersii00000219-RA_DEF7, mschreibersii00000221-RA_DEF7	msobrinus00000166-RA_DEF7	palecto00000103-RA_DEF7			raegyptiacus00000139-RA_DEFA5	rferrumequinum00000048-RA_DEFA5, rferrumequinum00000046-RA_DEFA5, rferrumequinum00000047-RA_DEFA5, rferrumequinum00000049-RA_DEFA5		shondurensis00000186-RA_DEFA5, shondurensis00000184-RA_DEFA1		tsaurophila00000208-RA_DEFA5
N0.HOG0000001	OG0000001	n0		ajamaicensis00000031-RA_CTHL1	btaurus_CTHL1, btaurus_CTHL1, btaurus_CTHL5, btaurus_CTHL6, btaurus_CTHL7, btaurus_CTHL4, btaurus_CTHL2, btaurus_CTHL3	clfamiliaris_CTHL	drotundus00000066-RA_CTHL	ecaballus_ECTHL2, ecaballus_ECTHL3	efuscus00000014-RA_CTHL	mbrandtii00000196-RA_CTHL7	mdavidii00000027-RA_CTHL	mlucifugus00000380-RA_CTHL, mlucifugus00000379-RA_CTHL, mlucifugus00000390-RA_CTHL	mmolossus00000215-RA_CTHL	mmyotis00000201-RA_CTHL, mmyotis00000200-RA_CTHL			msobrinus00000157-RA_CTHL		pdiscolor00000126-RA_CTHL, pdiscolor00000127-RA_CTHL		raegyptiacus00000054-RA_CTHL	rferrumequinum00000154-RA_CTHL	rsinicus00000049-RA_CTHL	shondurensis00000031-RA_CTHL1	sscrofa_CTHL, sscrofa_CTHL, sscrofa_CTHL, sscrofa_CTHL1, sscrofa_CTHL3, sscrofa_CTHL1, sscrofa_CTHL2	tsaurophila00000223-RA_CTHL, tsaurophila00000222-RA_CTHL, tsaurophila00000182-RA_CTHL
N0.HOG0000002	OG0000002	n3			btaurus_EDEFB, btaurus_DEFB4A, btaurus_DEFB5, btaurus_DEFB6, sbtaurus_DEFB2, btaurus_DEFB3, btaurus_DEFB7, btaurus_DEFB8, btaurus_DEFB9	clfamiliaris_DEFB4A		ecaballus_DEFB4B, ecaballus_DEFB4B, ecaballus_DEFB4B, ecaballus_DEFB4B, ecaballus_DEFB4B	efuscus00000234-RA_DEFB6																sscrofa_DEFB1
N0.HOG0000003	OG0000002	n19						ecaballus_DEFB103A	efuscus00000235-RA_DEFB103A	mbrandtii00000283-RA_DEFB103A	mdavidii00000212-RA_DEFB103A	mlucifugus00000283-RA_DEFB103A	mmolossus00000132-RA_DEFB103A	mmyotis00000322-RA_DEFB103A	mnatalensis00000050-RA_DEFB103A	mschreibersii00000183-RA_DEFB103A		palecto00000099-RA_DEFB103A		pvampyrus00000179-RA_DEFB103A	raegyptiacus00000142-RA_DEFB103A	rferrumequinum00000044-RA_DEFB103A	rsinicus00000230-RA_DEFB103A
N0.HOG0000004	OG0000002	n31	acaudifer00000229-RA_DEFB103A	ajamaicensis00000252-RA_DEFB103A															pdiscolor00000204-RA_DEFB103A					shondurensis00000182-RA_DEFB103A		tsaurophila00000200-RA_DEFB103A
N0.HOG0000005	OG0000003	n2			btaurus_DEFB110	clfamiliaris_DEFB110, clfamiliaris_DEFB110			efuscus00000186-RA_DEFB110	mbrandtii00000153-RA_DEFB110	mdavidii00000075-RA_DEFB110	mlucifugus00000135-RA_DEFB110		mmyotis00000133-RA_DEFB110	mnatalensis00000029-RA_DEFB110	mschreibersii00000084-RA_DEFB110		palecto00000093-RA_D107A		pvampyrus00000174-RA_D107A		rferrumequinum00000069-RA_DEFB110			sscrofa_DEFB110
N0.HOG0000006	OG0000003	n12	acaudifer00000139-RA_DEFB134	ajamaicensis00000002-RA_DEFB134	btaurus_DEFB134	clfamiliaris_DEFB134	drotundus00000053-RA_DEFB134				mdavidii00000090-RA_DEFB134	mlucifugus00000006-RA_DEFB134			mnatalensis00000020-RA_DEFB134		msobrinus00000083-RA_DEFB134	palecto00000082-RA_DEFB134	pdiscolor00000151-RA_DEFB134	pvampyrus00000206-RA_DEFB134	raegyptiacus00000178-RA_DEFB134			shondurensis00000067-RA_DEFB134	sscrofa_DEFB134	tsaurophila00000126-RA_DEFB134
N0.HOG0000007	OG0000004	n1			btaurus_DEFB119	clfamiliaris_DEFB119		ecaballus_DEFB119, ecaballus_DEFB119							mnatalensis00000127-RA_DEFB119							rferrumequinum00000263-RA_DEFB119
N0.HOG0000008	OG0000004	n6	acaudifer00000178-RA_DEFB119	ajamaicensis00000123-RA_DEFB119	btaurus_DEFB119		drotundus00000040-RA_DEFB119	ecaballus_DEFB119, ecaballus_DEFB119	efuscus00000040-RA_DEFB121	mbrandtii00000083-RA_DEFB119	mdavidii00000093-RA_DEFB119		mmolossus00000093-RA_DEFB119	mmyotis00000154-RA_DEFB119	mnatalensis00000128-RA_DEFB119	mschreibersii00000099-RA_DEFB119	msobrinus00000100-RA_DEFB119	palecto00000022-RA_DEFB119	pdiscolor00000170-RA_DEFB119	pvampyrus00000161-RA_DEFB119			rsinicus00000147-RA_DEFB119	shondurensis00000011-RA_DEFB121		tsaurophila00000033-RA_DEFB119
N0.HOG0000009	OG0000005	n0	acaudifer00000165-RA_DEFB128	ajamaicensis00000114-RA_DEFB128		clfamiliaris_DEFB128, clfamiliaris_DEFB128	drotundus00000031-RA_DEFB128	ecaballus_DEFB128	efuscus00000047-RA_DEFB128	mbrandtii00000171-RA_DEFB128	mdavidii00000152-RA_DFB20	mlucifugus00000084-RA_DEFB128	mmolossus00000101-RA_DEFB128	mmyotis00000161-RA_DFB20	mnatalensis00000120-RA_DEFB128	mschreibersii00000195-RA_DEFB128	msobrinus00000109-RA_DEFB128	palecto00000016-RA_DEFB128	pdiscolor00000179-RA_DEFB128	pvampyrus00000155-RA_DEFB128	raegyptiacus00000155-RA_DEFB128	rferrumequinum00000256-RA_DEFB128	rsinicus00000221-RA_DEFB128	shondurensis00000019-RA_DEFB128	sscrofa_DEFB128	tsaurophila00000075-RA_DEFB128
N0.HOG0000010	OG0000006	n0	acaudifer00000040-RA_DEFB113	ajamaicensis00000174-RA_DEFB113		clfamiliaris_DEFB113	drotundus00000195-RA_DEFB113	ecaballus_DEFB113	efuscus00000185-RA_DEFB113	mbrandtii00000154-RA_DEFB113	mdavidii00000076-RA_DEFB113	mlucifugus00000134-RA_DEFB113	mmolossus00000120-RA_DEFB113	mmyotis00000134-RA_DEFB113	mnatalensis00000030-RA_DEFB113	mschreibersii00000085-RA_DEFB113	msobrinus00000062-RA_DEFB113	palecto00000008-RA_DEFB113	pdiscolor00000069-RA_DEFB113	pvampyrus00000026-RA_DEFB113	raegyptiacus00000006-RA_DEFB113	rferrumequinum00000070-RA_DEFB113	rsinicus00000009-RA_DEFB113	shondurensis00000039-RA_DEFB113	sscrofa_DEFB113	tsaurophila00000008-RA_DEFB113
N0.HOG0000011	OG0000007	n2				clfamiliaris_DEFB124		ecaballus_DEFB124
N0.HOG0000012	OG0000007	n4	acaudifer00000117-RA_DEFB124	ajamaicensis00000127-RA_DEFB124	btaurus_DEFB124		drotundus00000044-RA_DFB25												pdiscolor00000166-RA_DEFB124					shondurensis00000015-RA_DEFB124		tsaurophila00000029-RA_DEFB124
N0.HOG0000013	OG0000007	n14			btaurus_DEFB122	clfamiliaris_DEFB122, clfamiliaris_DEFB122, clfamiliaris_DEFB122					mdavidii00000095-RA_DEFB122			mmyotis00000152-RA_DEFB122
N0.HOG0000014	OG0000007	n19			btaurus_DEFB123									mmyotis00000151-RA_DEFB123		mschreibersii00000096-RA_DEFB123							rsinicus00000143-RA_DEFB123
N0.HOG0000015	OG0000008	n0	acaudifer00000166-RA_DEFB127	ajamaicensis00000115-RA_DEFB127	btaurus_DEFB127	clfamiliaris_DEFB127, clfamiliaris_DEFB127	drotundus00000032-RA_DEFB127	ecaballus_DEFB127	efuscus00000046-RA_DEFB127	mbrandtii00000170-RA_DEFB127	mdavidii00000153-RA_DEFB127	mlucifugus00000085-RA_DEFB127		mmyotis00000160-RA_DEFB127	mnatalensis00000121-RA_DEFB127	mschreibersii00000194-RA_DEFB127	msobrinus00000108-RA_DEFB127	palecto00000017-RA_DEFB127		pvampyrus00000156-RA_DEFB127	raegyptiacus00000154-RA_DEFB127	rferrumequinum00000257-RA_DEFB127	rsinicus00000220-RA_DEFB127	shondurensis00000018-RA_DEFB127	sscrofa_DEFB127, sscrofa_DEFB127
N0.HOG0000016	OG0000009	n0	acaudifer00000179-RA_DEFB121		btaurus_DEFB121	clfamiliaris_DEFB121	drotundus00000041-RA_DEFB121	ecaballus_DEFB121	efuscus00000039-RA_DEFB121	mbrandtii00000082-RA_DEFB121	mdavidii00000094-RA_DEFB121	mlucifugus00000093-RA_DEFB121	mmolossus00000092-RA_DEFB121	mmyotis00000153-RA_DEFB121	mnatalensis00000129-RA_DEFB121	mschreibersii00000098-RA_DEFB121	msobrinus00000101-RA_DEFB121	palecto00000023-RA_DEFB121	pdiscolor00000169-RA_DEFB121	pvampyrus00000162-RA_DEFB121	raegyptiacus00000148-RA_DEFB121	rferrumequinum00000264-RA_DEFB121	rsinicus00000146-RA_DEFB121	shondurensis00000012-RA_DEFB121	sscrofa_DEFB121	tsaurophila00000032-RA_DEFB121
N0.HOG0000017	OG0000010	n0	acaudifer00000137-RA_DEFB136	ajamaicensis00000005-RA_DEFB136	btaurus_DEFB136	clfamiliaris_DEFB136	drotundus00000051-RA_DEFB136		efuscus00000141-RA_DEFB136	mbrandtii00000167-RA_DEFB136	mdavidii00000088-RA_DEFB136	mlucifugus00000008-RA_DEFB136	mmolossus00000070-RA_DEFB136	mmyotis00000114-RA_DEFB136	mnatalensis00000018-RA_DEFB136	mschreibersii00000109-RA_DEFB136	msobrinus00000085-RA_DEFB136	palecto00000080-RA_DEFB136	pdiscolor00000149-RA_DEFB136	pvampyrus00000204-RA_DEFB136	raegyptiacus00000176-RA_DEFB136	rferrumequinum00000162-RA_DEFB136	rsinicus00000013-RA_DEFB136	shondurensis00000069-RA_DEFB136	sscrofa_DEFB136	tsaurophila00000124-RA_DEFB136
N0.HOG0000018	OG0000011	n0	acaudifer00000187-RA_DEFB116	ajamaicensis00000119-RA_DEFB116	btaurus_DEFB116	clfamiliaris_DEFB116	drotundus00000036-RA_DEFB116	ecaballus_DEFB116	efuscus00000042-RA_DEFB116	mbrandtii00000292-RA_DEFB116	mdavidii00000247-RA_DEFB116	mlucifugus00000091-RA_DEFB116	mmolossus00000096-RA_DEFB116	mmyotis00000156-RA_DEFB116			msobrinus00000097-RA_DEFB116	palecto00000020-RA_DEFB116	pdiscolor00000174-RA_DEFB116	pvampyrus00000159-RA_DEFB116	raegyptiacus00000151-RA_DEFB116		rsinicus00000150-RA_DEFB116			tsaurophila00000157-RA_DEFB116
N0.HOG0000019	OG0000012	n0	acaudifer00000138-RA_DFB30	ajamaicensis00000004-RA_DFB30, ajamaicensis00000003-RA_DEFB135		clfamiliaris_DEFB135	drotundus00000052-RA_DFB30		efuscus00000142-RA_DFB30	mbrandtii00000168-RA_DFB30			mmolossus00000071-RA_DFB30		mnatalensis00000019-RA_DFB30	mschreibersii00000108-RA_DFB30	msobrinus00000084-RA_DFB30	palecto00000081-RA_DFB30	pdiscolor00000150-RA_DFB30		raegyptiacus00000177-RA_DFB30	rferrumequinum00000161-RA_DFB30	rsinicus00000012-RA_DFB30	shondurensis00000068-RA_DFB30		tsaurophila00000125-RA_DFB30
N0.HOG0000020	OG0000013	n0	acaudifer00000172-RA_DEFB1	ajamaicensis00000144-RA_DEFB1		clfamiliaris_DEFB1		ecaballus_DEFB1	efuscus00000227-RA_DEFB1	mbrandtii00000293-RA_DEFB1		mlucifugus00000275-RA_DEFB1				mschreibersii00000059-RA_DEFB1				pvampyrus00000187-RA_DEFB1	raegyptiacus00000138-RA_DEFB1	rferrumequinum00000051-RA_DEFB1	rsinicus00000208-RA_DEFB1		sscrofa_DEFB1	tsaurophila00000136-RA_DEFB1
N0.HOG0000021	OG0000014	n0	acaudifer00000163-RA_DEFB132						efuscus00000048-RA_DEFB132	mbrandtii00000173-RA_DEFB132	mdavidii00000150-RA_DEFB132	mlucifugus00000082-RA_DEFB132	mmolossus00000103-RA_DEFB132	mmyotis00000163-RA_DEFB132	mnatalensis00000118-RA_DEFB132	mschreibersii00000138-RA_DEFB132	msobrinus00000110-RA_DEFB132	palecto00000015-RA_DEFB132	pdiscolor00000181-RA_DEFB132	pvampyrus00000154-RA_DEFB132						tsaurophila00000077-RA_DEFB132
N0.HOG0000022	OG0000015	n0		ajamaicensis00000118-RA_DEFB115		clfamiliaris_DEFB132	drotundus00000035-RA_DEFB115	ecaballus_DEFB115	efuscus00000043-RA_DEFB115	mbrandtii00000291-RA_DEFB115	mdavidii00000246-RA_DEFB115	mlucifugus00000090-RA_DEFB115	mmolossus00000097-RA_DEFB115	mmyotis00000157-RA_DEFB115	mnatalensis00000124-RA_DEFB115	mschreibersii00000191-RA_DEFB115			pdiscolor00000175-RA_DEFB115						sscrofa_DEFB115
N0.HOG0000023	OG0000016	n0		ajamaicensis00000173-RA_DEFB114	btaurus_DEFB114	clfamiliaris_DEFB114, clfamiliaris_DEFB112		ecaballus_DEFB114				mlucifugus00000136-RA_DEFB112		mmyotis00000132-RA_DEFB112			msobrinus00000063-RA_DEFB114	palecto00000009-RA_DEFB114		pvampyrus00000025-RA_DEFB114	raegyptiacus00000005-RA_DEFB114				sscrofa_DEFB114
N0.HOG0000024	OG0000017	n0					drotundus00000065-RA_CTHL					mlucifugus00000263-RA_CTHL	mmolossus00000214-RA_CTHL		mnatalensis00000141-RA_CTHL	mschreibersii00000021-RA_CTHL	msobrinus00000086-RA_CTHL					rferrumequinum00000155-RA_CTHL	rsinicus00000050-RA_CTHL
N0.HOG0000025	OG0000018	n0						ecaballus_DEFB133						mmyotis00000135-RA_DEFB133			msobrinus00000064-RA_DEFB133	palecto00000010-RA_DEFB133		pvampyrus00000024-RA_DEFB133	raegyptiacus00000004-RA_DEFB133	rferrumequinum00000071-RA_DEFB133			sscrofa_DEFB133
N0.HOG0000026	OG0000019	n0				clfamiliaris_DEFB118	drotundus00000038-RA_DEFB118						mmolossus00000095-RA_DEFB118		mnatalensis00000126-RA_DEFB118	mschreibersii00000101-RA_DEFB118			pdiscolor00000172-RA_DEFB118					shondurensis00000009-RA_DEFB118
N0.HOG0000027	OG0000020	n0					drotundus00000286-RA_DFB33		efuscus00000233-RA_DFB33	mbrandtii00000281-RA_DFB33	mdavidii00000211-RA_DFB33	mlucifugus00000282-RA_DFB33		mmyotis00000320-RA_DFB33			msobrinus00000167-RA_DFB33
N0.HOG0000028	OG0000021	n0				clfamiliaris_DEFB105A, clfamiliaris_DEFB105A				mbrandtii00000209-RA_DFB12		mlucifugus00000313-RA_DFB12								pvampyrus00000175-RA_DFB35
N0.HOG0000029	OG0000022	n0			btaurus_DEFB13, btaurus_DEFB7C, btaurus_DEFB12, btaurus_DEFB13
N0.HOG0000030	OG0000023	n0			btaurus_DEFB129	clfamiliaris_DEFB129		ecaballus_DEFB129																	sscrofa_DEFB129
N0.HOG0000031	OG0000024	n0				clfamiliaris_DEFB125, clfamiliaris_DEFB125									mnatalensis00000123-RA_DEFB125										sscrofa_DEFB125
N0.HOG0000032	OG0000025	n0						ecaballus_DEFB108B														rferrumequinum00000031-RA_DEFB108	rsinicus00000081-RA_DEFB108		sscrofa_DEFB108B
N0.HOG0000033	OG0000026	-	acaudifer00000056-RA_DEFB130										mmolossus00000139-RA_DEFB130						pdiscolor00000197-RA_DEFB130
N0.HOG0000034	OG0000027	-				clfamiliaris_DEFB126								mmyotis00000159-RA_DEFB126									rsinicus00000219-RA_DEFB126
N0.HOG0000035	OG0000028	-	acaudifer00000056-RA_DEFB109_dup																pdiscolor00000197-RA_DEFB109_dup
N0.HOG0000036	OG0000029	-			btaurus_DEFB10, btaurus_DEFB10
N0.HOG0000037	OG0000030	-			btaurus_DEFB1, btaurus_DEFB1

## Sheet: Table S8
	Base branch probabilities					Base change					Base count
Species	DEFA	DEFB123	DEFB1	DEFB114	DEFB126	DEFA	DEFB123	DEFB1	DEFB114	DEFB126	DEFA	DEFB123	DEFB1	DEFB114	DEFB126	Node
Molossus_molossus<1>	0.158848	0.158848	0.158848	0.158848	0.158848	-1	-1	-1	-1	-1	0	0	0	0	0	Molossidae
Miniopterus_schreibersii<2>	0.5518	0.526982	0.526982	0.5	0.5	0	0	0	0	0	2	1	1	0	0	Miniopteridae
Miniopterus_natalensis<3>	0.027337	0.0402859	0.0402859	0.5	0.5	1	-1	-1	0	0	3	0	0	0	0	Miniopteridae
Myotis_brandtii<4>	0.060306	0.5	0.540489	0.0603062	0.5	-1	0	0	-1	0	0	0	1	0	0	Vespertilionidae
Myotis_lucifugus<5>	0.540489	0.5	0.540489	0.540489	0.5	0	0	0	0	0	1	0	1	1	0	Vespertilionidae
Myotis_myotis<6>	0.538615	0.538615	0.5	0.538615	0.538615	0	0	0	0	0	1	1	0	1	1	Vespertilionidae
Myotis_davidii<7>	0.538615	0.057534	0.5	0.057534	0.057534	0	-1	0	-1	-1	1	0	0	0	0	Vespertilionidae
Eptesicus_fuscus<8>	0.032183	0.0927754	0.562547	0.0927754	0.0927754	1	-1	0	-1	-1	2	0	1	0	0	Vespertilionidae
Sturnira_hondurensis<9>	0.026489	0.5	0.0768686	0.0768686	0.5	1	0	-1	-1	0	2	0	0	0	0	Phyllostomidae
Artibeus_jamaicensis<10>	0.551716	0.5	0.551716	0.551716	0.5	0	0	0	0	0	1	0	1	1	0	Phyllostomidae
Phyllostomus_discolor<11>	0.079791	0.5	0.0797909	0.5	0.5	-1	0	-1	0	0	0	0	0	0	0	Phyllostomidae
Tonatia_saurophila<12>	0.553702	0.5	0.553702	0.5	0.5	0	0	0	0	0	1	0	1	0	0	Phyllostomidae
Anoura_caudifer<13>	0.035736	0.5	0.569262	0.102603	0.5	1	0	0	-1	0	2	0	1	0	0	Phyllostomidae
Desmodus_rotundus<14>	0.575377	0.5	0.111526	0.111526	0.5	0	0	-1	-1	0	1	0	0	0	0	Phyllostomidae
Pteropus_vampyrus<15>	0.041106	0.5	0.527534	0.527534	0.5	-1	0	0	0	0	0	0	1	1	0	Pteropodidae
Pteropus_alecto<16>	0.527534	0.5	0.0411061	0.527534	0.5	0	0	-1	0	0	1	0	0	1	0	Pteropodidae
Rousettus_aegyptiacus<17>	0.551926	0.5	0.551926	0.551926	0.5	0	0	0	0	0	1	0	1	1	0	Pteropodidae
Macroglossus_sobrinus<18>	0.555157	0.5	0.0819292	0.555157	0.5	0	0	-1	0	0	1	0	0	1	0	Pteropodidae
Rhinolophus_sinicus<19>	0.048545	0.532546	0.532546	0.5	0.532546	-1	0	0	0	0	0	1	1	0	1	Rhinolophidae
Rhinolophus_ferrumequinum<20>	1.81e-05	0.0485449	0.532546	0.5	0.0485449	3	-1	0	0	-1	4	0	1	0	0	Rhinolophidae
Bos_taurus<21>	0.424382	0.80678	0.424382	0.80678	0.424382	-1	0	-1	0	-1	0	1	0	1	0	Outgroup
Sus_scrofa<22>	0.424382	0.424382	0.80678	0.80678	0.424382	-1	-1	0	0	-1	0	0	1	1	0	Outgroup
Equus_caballus<23>	1.58e-07	0.790346	0.412091	0.412091	0.790346	17	-1	0	0	-1	18	0	1	1	0	Outgroup
Canis_lupus_familiaris<24>	0.787241	0.787241	0.409467	0.174236	0.409467	-1	-1	0	1	0	0	0	1	2	1	Outgroup
<25>	N/A	N/A	N/A	N/A	N/A	0	0	0	0	0	1	1	1	1	1	Ancestral nodes
<26>	0.570172	0.570172	0.570172	0.570172	0.570172	0	0	0	0	0	1	1	1	1	1	Ancestral nodes
<27>	0.61231	0.61231	0.61231	0.61231	0.61231	0	0	0	0	0	1	1	1	1	1	Ancestral nodes
<28>	0.513019	0.513019	0.513019	0.513019	0.513019	0	0	0	0	0	1	1	1	1	1	Ancestral nodes
<29>	0.508072	0.508072	0.508072	0.508072	0.508072	0	0	0	0	0	1	1	1	1	1	Ancestral nodes
<30>	0.042323	0.58163	0.58163	0.120627	0.120627	1	0	0	-1	-1	2	1	1	0	0	Ancestral node Miniopteridae
<31>	0.548411	0.548411	0.548411	0.548411	0.548411	0	0	0	0	0	1	1	1	1	1	Ancestral nodes
<32>	0.518923	0.518923	0.518923	0.518923	0.518923	0	0	0	0	0	1	1	1	1	1	Ancestral nodes
<33>	0.506432	0.00963802	0.506432	0.506432	0.00963802	0	-1	0	0	-1	1	0	1	1	0	Ancestral node Myotis lucifugus/Myotis brandtii
<34>	0.508506	0.508506	0.0127407	0.508506	0.508506	0	0	-1	0	0	1	1	0	1	1	Ancestral node Myotis davidii/Myotis myotis
<35>	0.548706	0.0724353	0.548706	0.548706	0.0724353	0	-1	0	0	-1	1	0	1	1	0	Ancestral nodes
<36>	0.507641	0.5	0.507641	0.507641	0.5	0	0	0	0	0	1	0	1	1	0	Ancestral nodes
<37>	0.502292	0.5	0.502292	0.502292	0.5	0	0	0	0	0	1	0	1	1	0	Ancestral nodes
<38>	0.518463	0.5	0.518463	0.518463	0.5	0	0	0	0	0	1	0	1	1	0	Ancestral nodes
<39>	0.516239	0.5	0.516239	0.0242912	0.5	0	0	0	-1	0	1	0	1	0	0	Ancestral node Tonatia saurophila/Phyllostomus discolor
<40>	0.592978	0.592978	0.592978	0.592978	0.592978	0	0	0	0	0	1	1	1	1	1	Ancestral nodes
<41>	0.564941	0.0962828	0.564941	0.564941	0.0962828	0	-1	0	0	-1	1	0	1	1	0	Ancestral nodes
<42>	0.503807	0.5	0.503807	0.503807	0.5	0	0	0	0	0	1	0	1	1	0	Ancestral nodes
<43>	0.526524	0.5	0.526524	0.526524	0.5	0	0	0	0	0	1	0	1	1	0	Ancestral nodes
<44>	0.585269	0.585269	0.585269	0.125912	0.585269	0	0	0	-1	0	1	1	1	0	1	Ancestral nodes
<45>	0.589008	0.589008	0.589008	0.589008	0.589008	0	0	0	0	0	1	1	1	1	1	Ancestral nodes
<46>	0.518111	0.518111	0.518111	0.518111	0.518111	0	0	0	0	0	1	1	1	1	1	Ancestral nodes
<47>	0.596692	0.596692	0.596692	0.596692	0.596692	0	0	0	0	0	1	1	1	1	1	Ancestral nodes

## Sheet: Table S9
	Species Tree Node	Gene Tree Node	Support	Type	Genes 1	Genes 2
OG0000000	ecaballus	n1	1	Terminal	ecaballus_ecaballus_DEFA_4, ecaballus_ecaballus_DEFA_3, ecaballus_ecaballus_DEFA1, ecaballus_ecaballus_DEFA1, ecaballus_ecaballus_DEFA_1, ecaballus_ecaballus_DEFA20, ecaballus_ecaballus_DEFA_5L	ecaballus_ecaballus_DEFA_27, ecaballus_ecaballus_DEFA_25, ecaballus_ecaballus_DEFA20, ecaballus_ecaballus_DEFA20, ecaballus_ecaballus_DEFA20, ecaballus_ecaballus_DEFA_21, ecaballus_ecaballus_DEFA_20, ecaballus_ecaballus_DEFA22, ecaballus_ecaballus_DEFA_22, ecaballus_ecaballus_DEFA_24, ecaballus_ecaballus_DEFA20
OG0000000	ecaballus	n2	1	Terminal	ecaballus_ecaballus_DEFA_4, ecaballus_ecaballus_DEFA_3, ecaballus_ecaballus_DEFA1, ecaballus_ecaballus_DEFA1, ecaballus_ecaballus_DEFA_1	ecaballus_ecaballus_DEFA20, ecaballus_ecaballus_DEFA_5L
OG0000000	ecaballus	n3	1	Terminal	ecaballus_ecaballus_DEFA_4, ecaballus_ecaballus_DEFA_3	ecaballus_ecaballus_DEFA1, ecaballus_ecaballus_DEFA1, ecaballus_ecaballus_DEFA_1
OG0000000	ecaballus	n4	1	Terminal	ecaballus_ecaballus_DEFA_4	ecaballus_ecaballus_DEFA_3
OG0000000	ecaballus	n5	1	Terminal	ecaballus_ecaballus_DEFA1, ecaballus_ecaballus_DEFA1	ecaballus_ecaballus_DEFA_1
OG0000000	ecaballus	n6	1	Terminal	ecaballus_ecaballus_DEFA1	ecaballus_ecaballus_DEFA1
OG0000000	ecaballus	n7	1	Terminal	ecaballus_ecaballus_DEFA20	ecaballus_ecaballus_DEFA_5L
OG0000000	ecaballus	n8	1	Terminal	ecaballus_ecaballus_DEFA_27, ecaballus_ecaballus_DEFA_25, ecaballus_ecaballus_DEFA20, ecaballus_ecaballus_DEFA20, ecaballus_ecaballus_DEFA20	ecaballus_ecaballus_DEFA_21, ecaballus_ecaballus_DEFA_20, ecaballus_ecaballus_DEFA22, ecaballus_ecaballus_DEFA_22, ecaballus_ecaballus_DEFA_24, ecaballus_ecaballus_DEFA20
OG0000000	ecaballus	n9	1	Terminal	ecaballus_ecaballus_DEFA_27, ecaballus_ecaballus_DEFA_25	ecaballus_ecaballus_DEFA20, ecaballus_ecaballus_DEFA20, ecaballus_ecaballus_DEFA20
OG0000000	ecaballus	n10	1	Terminal	ecaballus_ecaballus_DEFA_27	ecaballus_ecaballus_DEFA_25
OG0000000	ecaballus	n11	1	Terminal	ecaballus_ecaballus_DEFA20, ecaballus_ecaballus_DEFA20	ecaballus_ecaballus_DEFA20
OG0000000	ecaballus	n12	1	Terminal	ecaballus_ecaballus_DEFA20	ecaballus_ecaballus_DEFA20
OG0000000	ecaballus	n13	1	Terminal	ecaballus_ecaballus_DEFA_21	ecaballus_ecaballus_DEFA_20, ecaballus_ecaballus_DEFA22, ecaballus_ecaballus_DEFA_22, ecaballus_ecaballus_DEFA_24, ecaballus_ecaballus_DEFA20
OG0000000	ecaballus	n14	1	Terminal	ecaballus_ecaballus_DEFA_20, ecaballus_ecaballus_DEFA22, ecaballus_ecaballus_DEFA_22, ecaballus_ecaballus_DEFA_24	ecaballus_ecaballus_DEFA20
OG0000000	ecaballus	n15	1	Terminal	ecaballus_ecaballus_DEFA_20, ecaballus_ecaballus_DEFA22, ecaballus_ecaballus_DEFA_22	ecaballus_ecaballus_DEFA_24
OG0000000	ecaballus	n16	1	Terminal	ecaballus_ecaballus_DEFA_20	ecaballus_ecaballus_DEFA22, ecaballus_ecaballus_DEFA_22
OG0000000	ecaballus	n17	1	Terminal	ecaballus_ecaballus_DEFA22	ecaballus_ecaballus_DEFA_22
OG0000000	rferrumequinum	n20	1	Terminal	rferrumequinum_rferrumequinum00000048-RA_DEFA5	rferrumequinum_rferrumequinum00000046-RA_DEFA5, rferrumequinum_rferrumequinum00000047-RA_DEFA5, rferrumequinum_rferrumequinum00000049-RA_DEFA5
OG0000000	rferrumequinum	n21	1	Terminal	rferrumequinum_rferrumequinum00000046-RA_DEFA5, rferrumequinum_rferrumequinum00000047-RA_DEFA5	rferrumequinum_rferrumequinum00000049-RA_DEFA5
OG0000000	rferrumequinum	n22	1	Terminal	rferrumequinum_rferrumequinum00000046-RA_DEFA5	rferrumequinum_rferrumequinum00000047-RA_DEFA5
OG0000000	N11	n26	0.428571	Non-Terminal	efuscus_efuscus00000231-RA_DEFA5, mdavidii_mdavidii00000209-RA_DEF7, mlucifugus_mlucifugus00000279-RA_DEF7, mmyotis_mmyotis00000317-RA_DEF7, mnatalensis_mnatalensis00000055-RA_DEF7, mnatalensis_mnatalensis00000054-RA_DEF6, mschreibersii_mschreibersii00000219-RA_DEF7	efuscus_efuscus00000179-RA_DEFA1, mnatalensis_mnatalensis00000056-RA_DEF7, mschreibersii_mschreibersii00000221-RA_DEF7
OG0000000	mnatalensis	n32	1	Terminal	mnatalensis_mnatalensis00000055-RA_DEF7	mnatalensis_mnatalensis00000054-RA_DEF6
OG0000000	N12	n37	0.2	Non-Terminal	shondurensis_shondurensis00000186-RA_DEFA5	acaudifer_acaudifer00000239-RA_DEFA5, acaudifer_acaudifer00000220-RA_DEFA1, ajamaicensis_ajamaicensis00000249-RA_DEFA1, shondurensis_shondurensis00000184-RA_DEFA1
OG0000000	N12	n38	0.2	Non-Terminal	acaudifer_acaudifer00000239-RA_DEFA5	acaudifer_acaudifer00000220-RA_DEFA1, ajamaicensis_ajamaicensis00000249-RA_DEFA1, shondurensis_shondurensis00000184-RA_DEFA1
OG0000001	ecaballus	n3	1	Terminal	ecaballus_ecaballus_ECTHL2	ecaballus_ecaballus_ECTHL3
OG0000001	sscrofa	n5	1	Terminal	sscrofa_sscrofa_CTHL, sscrofa_sscrofa_CTHL, sscrofa_sscrofa_CTHL	sscrofa_sscrofa_CTHL1, sscrofa_sscrofa_CTHL3, sscrofa_sscrofa_CTHL1, sscrofa_sscrofa_CTHL2
OG0000001	sscrofa	n6	1	Terminal	sscrofa_sscrofa_CTHL	sscrofa_sscrofa_CTHL, sscrofa_sscrofa_CTHL
OG0000001	sscrofa	n7	1	Terminal	sscrofa_sscrofa_CTHL	sscrofa_sscrofa_CTHL
OG0000001	sscrofa	n8	1	Terminal	sscrofa_sscrofa_CTHL1	sscrofa_sscrofa_CTHL3, sscrofa_sscrofa_CTHL1, sscrofa_sscrofa_CTHL2
OG0000001	sscrofa	n9	1	Terminal	sscrofa_sscrofa_CTHL3	sscrofa_sscrofa_CTHL1, sscrofa_sscrofa_CTHL2
OG0000001	sscrofa	n10	1	Terminal	sscrofa_sscrofa_CTHL1	sscrofa_sscrofa_CTHL2
OG0000001	btaurus	n11	1	Terminal	btaurus_btaurus_CTHL1, btaurus_btaurus_CTHL1, btaurus_btaurus_CTHL5, btaurus_btaurus_CTHL6	btaurus_btaurus_CTHL7, btaurus_btaurus_CTHL4, btaurus_btaurus_CTHL2, btaurus_btaurus_CTHL3
OG0000001	btaurus	n12	1	Terminal	btaurus_btaurus_CTHL1, btaurus_btaurus_CTHL1	btaurus_btaurus_CTHL5, btaurus_btaurus_CTHL6
OG0000001	btaurus	n13	1	Terminal	btaurus_btaurus_CTHL1	btaurus_btaurus_CTHL1
OG0000001	btaurus	n14	1	Terminal	btaurus_btaurus_CTHL5	btaurus_btaurus_CTHL6
OG0000001	btaurus	n15	1	Terminal	btaurus_btaurus_CTHL7	btaurus_btaurus_CTHL4, btaurus_btaurus_CTHL2, btaurus_btaurus_CTHL3
OG0000001	btaurus	n16	1	Terminal	btaurus_btaurus_CTHL4	btaurus_btaurus_CTHL2, btaurus_btaurus_CTHL3
OG0000001	btaurus	n17	1	Terminal	btaurus_btaurus_CTHL2	btaurus_btaurus_CTHL3
OG0000001	mmyotis	n28	1	Terminal	mmyotis_mmyotis00000201-RA_CTHL	mmyotis_mmyotis00000200-RA_CTHL
OG0000001	mlucifugus	n29	1	Terminal	mlucifugus_mlucifugus00000380-RA_CTHL	mlucifugus_mlucifugus00000379-RA_CTHL, mlucifugus_mlucifugus00000390-RA_CTHL
OG0000001	mlucifugus	n30	1	Terminal	mlucifugus_mlucifugus00000379-RA_CTHL	mlucifugus_mlucifugus00000390-RA_CTHL
OG0000001	tsaurophila	n35	1	Terminal	tsaurophila_tsaurophila00000223-RA_CTHL, tsaurophila_tsaurophila00000222-RA_CTHL	tsaurophila_tsaurophila00000182-RA_CTHL
OG0000001	tsaurophila	n36	1	Terminal	tsaurophila_tsaurophila00000223-RA_CTHL	tsaurophila_tsaurophila00000222-RA_CTHL
OG0000001	pdiscolor	n37	1	Terminal	pdiscolor_pdiscolor00000126-RA_CTHL	pdiscolor_pdiscolor00000127-RA_CTHL
OG0000002	N0	n2	0.0833333	Non-Terminal	sscrofa_sscrofa_DEFB1, efuscus_efuscus00000234-RA_DEFB6, clfamiliaris_clfamiliaris_DEFB4A, btaurus_btaurus_EDEFB, btaurus_btaurus_DEFB4A, btaurus_btaurus_DEFB5, btaurus_btaurus_DEFB6, btaurus_sbtaurus_DEFB2, btaurus_btaurus_DEFB3, btaurus_btaurus_DEFB7, btaurus_btaurus_DEFB8, btaurus_btaurus_DEFB9, ecaballus_ecaballus_DEFB4B, ecaballus_ecaballus_DEFB4B, ecaballus_ecaballus_DEFB4B, ecaballus_ecaba…	mnatalensis_mnatalensis00000050-RA_DEFB103A, mschreibersii_mschreibersii00000183-RA_DEFB103A, mmolossus_mmolossus00000132-RA_DEFB103A, efuscus_efuscus00000235-RA_DEFB103A, mbrandtii_mbrandtii00000283-RA_DEFB103A, mlucifugus_mlucifugus00000283-RA_DEFB103A, mmyotis_mmyotis00000322-RA_DEFB103A, mdavidii_mdavidii00000212-RA_DEFB103A, rferrumequinum_rferrumequinum00000044-RA_DEFB103A, rsinicus_rsinicu…
OG0000002	btaurus	n7	1	Terminal	btaurus_btaurus_EDEFB	btaurus_btaurus_DEFB4A, btaurus_btaurus_DEFB5, btaurus_btaurus_DEFB6, btaurus_sbtaurus_DEFB2, btaurus_btaurus_DEFB3, btaurus_btaurus_DEFB7, btaurus_btaurus_DEFB8, btaurus_btaurus_DEFB9
OG0000002	btaurus	n8	1	Terminal	btaurus_btaurus_DEFB4A, btaurus_btaurus_DEFB5	btaurus_btaurus_DEFB6, btaurus_sbtaurus_DEFB2, btaurus_btaurus_DEFB3, btaurus_btaurus_DEFB7, btaurus_btaurus_DEFB8, btaurus_btaurus_DEFB9
OG0000002	btaurus	n9	1	Terminal	btaurus_btaurus_DEFB4A	btaurus_btaurus_DEFB5
OG0000002	btaurus	n10	1	Terminal	btaurus_btaurus_DEFB6	btaurus_sbtaurus_DEFB2, btaurus_btaurus_DEFB3, btaurus_btaurus_DEFB7, btaurus_btaurus_DEFB8, btaurus_btaurus_DEFB9
OG0000002	btaurus	n11	1	Terminal	btaurus_sbtaurus_DEFB2, btaurus_btaurus_DEFB3	btaurus_btaurus_DEFB7, btaurus_btaurus_DEFB8, btaurus_btaurus_DEFB9
OG0000002	btaurus	n12	1	Terminal	btaurus_sbtaurus_DEFB2	btaurus_btaurus_DEFB3
OG0000002	btaurus	n13	1	Terminal	btaurus_btaurus_DEFB7	btaurus_btaurus_DEFB8, btaurus_btaurus_DEFB9
OG0000002	btaurus	n14	1	Terminal	btaurus_btaurus_DEFB8	btaurus_btaurus_DEFB9
OG0000002	ecaballus	n15	1	Terminal	ecaballus_ecaballus_DEFB4B	ecaballus_ecaballus_DEFB4B, ecaballus_ecaballus_DEFB4B, ecaballus_ecaballus_DEFB4B, ecaballus_ecaballus_DEFB4B
OG0000002	ecaballus	n16	1	Terminal	ecaballus_ecaballus_DEFB4B	ecaballus_ecaballus_DEFB4B, ecaballus_ecaballus_DEFB4B, ecaballus_ecaballus_DEFB4B
OG0000002	ecaballus	n17	1	Terminal	ecaballus_ecaballus_DEFB4B	ecaballus_ecaballus_DEFB4B, ecaballus_ecaballus_DEFB4B
OG0000002	ecaballus	n18	1	Terminal	ecaballus_ecaballus_DEFB4B	ecaballus_ecaballus_DEFB4B
OG0000003	N0	n1	0.333333	Non-Terminal	palecto_palecto00000093-RA_D107A, pvampyrus_pvampyrus00000174-RA_D107A, rferrumequinum_rferrumequinum00000069-RA_DEFB110, clfamiliaris_clfamiliaris_DEFB110, efuscus_efuscus00000186-RA_DEFB110, mbrandtii_mbrandtii00000153-RA_DEFB110, mdavidii_mdavidii00000075-RA_DEFB110, mlucifugus_mlucifugus00000135-RA_DEFB110, mmyotis_mmyotis00000133-RA_DEFB110, btaurus_btaurus_DEFB110, clfamiliaris_clfamiliaris…	clfamiliaris_clfamiliaris_DEFB134, sscrofa_sscrofa_DEFB134, mnatalensis_mnatalensis00000020-RA_DEFB134, mdavidii_mdavidii00000090-RA_DEFB134, mlucifugus_mlucifugus00000006-RA_DEFB134, acaudifer_acaudifer00000139-RA_DEFB134, ajamaicensis_ajamaicensis00000002-RA_DEFB134, drotundus_drotundus00000053-RA_DEFB134, tsaurophila_tsaurophila00000126-RA_DEFB134, btaurus_btaurus_DEFB134, shondurensis_shondur…
OG0000003	N0	n6	0.0416667	Non-Terminal	clfamiliaris_clfamiliaris_DEFB110	efuscus_efuscus00000186-RA_DEFB110, mbrandtii_mbrandtii00000153-RA_DEFB110, mdavidii_mdavidii00000075-RA_DEFB110, mlucifugus_mlucifugus00000135-RA_DEFB110, mmyotis_mmyotis00000133-RA_DEFB110, btaurus_btaurus_DEFB110, clfamiliaris_clfamiliaris_DEFB110, mnatalensis_mnatalensis00000029-RA_DEFB110, mschreibersii_mschreibersii00000084-RA_DEFB110
OG0000004	N0	n0	0.125	Non-Terminal	ecaballus_ecaballus_DEFB119, ecaballus_ecaballus_DEFB119, clfamiliaris_clfamiliaris_DEFB119, btaurus_btaurus_DEFB119, mnatalensis_mnatalensis00000127-RA_DEFB119, rferrumequinum_rferrumequinum00000263-RA_DEFB119	ecaballus_ecaballus_DEFB119, ecaballus_ecaballus_DEFB119, rsinicus_rsinicus00000147-RA_DEFB119, btaurus_btaurus_DEFB119, msobrinus_msobrinus00000100-RA_DEFB119, palecto_palecto00000022-RA_DEFB119, pvampyrus_pvampyrus00000161-RA_DEFB119, mmolossus_mmolossus00000093-RA_DEFB119, mnatalensis_mnatalensis00000128-RA_DEFB119, mschreibersii_mschreibersii00000099-RA_DEFB119, efuscus_efuscus00000040-RA_DEF…
OG0000004	ecaballus	n3	1	Terminal	ecaballus_ecaballus_DEFB119	ecaballus_ecaballus_DEFB119
OG0000004	ecaballus	n7	1	Terminal	ecaballus_ecaballus_DEFB119	ecaballus_ecaballus_DEFB119
OG0000005	clfamiliaris	n17	1	Terminal	clfamiliaris_clfamiliaris_DEFB128	clfamiliaris_clfamiliaris_DEFB128
OG0000007	N0	n1	0.0833333	Non-Terminal	clfamiliaris_clfamiliaris_DEFB124, ecaballus_ecaballus_DEFB124	btaurus_btaurus_DEFB124, pdiscolor_pdiscolor00000166-RA_DEFB124, ajamaicensis_ajamaicensis00000127-RA_DEFB124, shondurensis_shondurensis00000015-RA_DEFB124, acaudifer_acaudifer00000117-RA_DEFB124, drotundus_drotundus00000044-RA_DFB25, tsaurophila_tsaurophila00000029-RA_DEFB124, pdiscolor_pdiscolor00000202-RA_D104A, sscrofa_sscrofa_DEFB123, btaurus_btaurus_DEFB122, clfamiliaris_clfamiliaris_DEFB12…
OG0000007	N0	n3	0.0833333	Non-Terminal	btaurus_btaurus_DEFB124, pdiscolor_pdiscolor00000166-RA_DEFB124, ajamaicensis_ajamaicensis00000127-RA_DEFB124, shondurensis_shondurensis00000015-RA_DEFB124, acaudifer_acaudifer00000117-RA_DEFB124, drotundus_drotundus00000044-RA_DFB25, tsaurophila_tsaurophila00000029-RA_DEFB124	pdiscolor_pdiscolor00000202-RA_D104A, sscrofa_sscrofa_DEFB123, btaurus_btaurus_DEFB122, clfamiliaris_clfamiliaris_DEFB122, clfamiliaris_clfamiliaris_DEFB122, clfamiliaris_clfamiliaris_DEFB122, mdavidii_mdavidii00000095-RA_DEFB122, mmyotis_mmyotis00000152-RA_DEFB122, rsinicus_rsinicus00000143-RA_DEFB123, mmyotis_mmyotis00000151-RA_DEFB123, mschreibersii_mschreibersii00000096-RA_DEFB123, btaurus_bt…
OG0000007	N0	n13	0.0833333	Non-Terminal	btaurus_btaurus_DEFB122, clfamiliaris_clfamiliaris_DEFB122, clfamiliaris_clfamiliaris_DEFB122, clfamiliaris_clfamiliaris_DEFB122, mdavidii_mdavidii00000095-RA_DEFB122, mmyotis_mmyotis00000152-RA_DEFB122	rsinicus_rsinicus00000143-RA_DEFB123, mmyotis_mmyotis00000151-RA_DEFB123, mschreibersii_mschreibersii00000096-RA_DEFB123, btaurus_btaurus_DEFB123
OG0000007	clfamiliaris	n16	1	Terminal	clfamiliaris_clfamiliaris_DEFB122	clfamiliaris_clfamiliaris_DEFB122, clfamiliaris_clfamiliaris_DEFB122
OG0000007	clfamiliaris	n17	1	Terminal	clfamiliaris_clfamiliaris_DEFB122	clfamiliaris_clfamiliaris_DEFB122
OG0000008	clfamiliaris	n3	1	Terminal	clfamiliaris_clfamiliaris_DEFB127	clfamiliaris_clfamiliaris_DEFB127
OG0000008	sscrofa	n5	1	Terminal	sscrofa_sscrofa_DEFB127	sscrofa_sscrofa_DEFB127
OG0000012	ajamaicensis	n15	1	Terminal	ajamaicensis_ajamaicensis00000004-RA_DFB30	ajamaicensis_ajamaicensis00000003-RA_DEFB135
OG0000016	N0	n7	0.0416667	Non-Terminal	clfamiliaris_clfamiliaris_DEFB114	btaurus_btaurus_DEFB114, clfamiliaris_clfamiliaris_DEFB112, mlucifugus_mlucifugus00000136-RA_DEFB112, mmyotis_mmyotis00000132-RA_DEFB112
OG0000021	clfamiliaris	n1	1	Terminal	clfamiliaris_clfamiliaris_DEFB105A	clfamiliaris_clfamiliaris_DEFB105A
OG0000022	btaurus	n0	1	Terminal	btaurus_btaurus_DEFB13	btaurus_btaurus_DEFB7C, btaurus_btaurus_DEFB12, btaurus_btaurus_DEFB13
OG0000022	btaurus	n1	1	Terminal	btaurus_btaurus_DEFB7C	btaurus_btaurus_DEFB12, btaurus_btaurus_DEFB13
OG0000022	btaurus	n2	1	Terminal	btaurus_btaurus_DEFB12	btaurus_btaurus_DEFB13
OG0000024	clfamiliaris	n2	1	Terminal	clfamiliaris_clfamiliaris_DEFB125	clfamiliaris_clfamiliaris_DEFB125
